# Supplementary material for: Effect of adjusting the challenge–skill balance for occupational therapy: study protocol for a randomised controlled trial
Source: PubMed Central journal article supplement — BMJ Open. 2018 Dec 9;8(12):e022438. doi: 10.1136/bmjopen-2018-022438 (PMC6292421; doi:10.1136/bmjopen-2018-022438), 2018-12-09
Supplement: bmjopen-2018-022438.draft_revisions.pdf [file bmjopen-2018-022438.draft_revisions.pdf]

# BMJ Open

BMJ Open is committed to open peer review. As part of this commitment we make the peer review history of every article we publish publicly available.

When an article is published we post the peer reviewers' comments and the authors' responses online. We also post the versions of the paper that were used during peer review. These are the versions that the peer review comments apply to.

The versions of the paper that follow are the versions that were submitted during the peer review process. They are not the versions of record or the final published versions. They should not be cited or distributed as the published version of this manuscript.

BMJ Open is an open access journal and the full, final, typeset and author-corrected version of record of the manuscript is available on our site with no access controls, subscription charges or pay-per-view fees (<http://bmjopen.bmj.com>).

If you have any questions on BMJ Open's open peer review process please email [info.bmjopen@bmj.com](mailto:info.bmjopen@bmj.com)

# BMJ Open

## Study protocol: Adjusting the challenge-skill balance for occupational therapy in a recovery rehabilitation unit: A proposal for a randomized controlled trial

|                               |                                                                                                                                                                                                                                                                                                                                                                                             |
|-------------------------------|---------------------------------------------------------------------------------------------------------------------------------------------------------------------------------------------------------------------------------------------------------------------------------------------------------------------------------------------------------------------------------------------|
| Journal:                      | <i>BMJ Open</i>                                                                                                                                                                                                                                                                                                                                                                             |
| Manuscript ID                 | bmjopen-2018-022438                                                                                                                                                                                                                                                                                                                                                                         |
| Article Type:                 | Protocol                                                                                                                                                                                                                                                                                                                                                                                    |
| Date Submitted by the Author: | 24-Feb-2018                                                                                                                                                                                                                                                                                                                                                                                 |
| Complete List of Authors:     | Yoshida, Ippei; Tokyo Metropolitan University Graduate School of Human Health Sciences, Department of Occupational Therapy; Harue hospital, Department of Rehabilitation<br>Hirao, Kazuki; Kibi International University Graduate School of Health Sciences<br>Kobayashi, Ryuji; Tokyo Metropolitan University Graduate School of Human Health Sciences, Department of Occupational Therapy |
| Keywords:                     | REHABILITATION MEDICINE, Occupational therapy, Flow model, Randomized control trial                                                                                                                                                                                                                                                                                                         |
|                               |                                                                                                                                                                                                                                                                                                                                                                                             |

SCHOLARONE™  
Manuscripts

1  
2 **Study protocol: Adjusting the challenge-skill balance for occupational therapy in a recovery**  
3 **rehabilitation unit: A proposal for a randomized controlled trial**  
4  
5

6 A. Ippei Yoshida, Kazuki Hirao, Ryuji Kobayashi

7 B. Ippei Yoshida, Tokyo Metropolitan University Graduate School of Human Health Sciences,  
8 Department of Occupational Therapy; Harue hospital, Department of Rehabilitation.

9 7-2-10, Higashiogu, Arakawa-ku, Tokyo, Japan 116-8551.

10 e-mail; ippe.i.yoshi@gmail.com, TEL; +81-3-3819-1211. FAX; +81-3-3892-2248.

11  
12  
13 C. Kazuki Hirao, Kibi International University Graduate School of Health Sciences, Okayama,  
14 Japan.

15  
16 Ryuji Kobayashi, Tokyo Metropolitan University Graduate School of Human Health Sciences,  
17 Department of Occupational Therapy, Tokyo, Japan.

18 D. REHABILITATION MEDICINE, Occupational therapy, Flow model, Randomized control trial

19 E. Word count: 3827  
20  
21  
22

23 **Abstract**

24 **Introduction:** Occupational therapy is defined as the promotion of client health and wellbeing  
25 through client-centered practice. However, there is a tendency to rely on the therapist's experience  
26 and values, and there is a difference between the client's and therapist's perceptions of the activity  
27 engaged in by the client. In previous studies that have applied "flow," activities supported by the  
28 occupational therapy of elderly people were analyzed, indicating that there is a difference in  
29 recognition. Therefore, we thought that more effective occupational therapy could be implemented  
30 by adjusting the challenge-skill balance, and invented a process called adjusting the challenge-skill  
31 balance for occupational therapy (ACS-OT). The purpose of this study was to verify the effect of  
32 ACS-OT with clients in the recovery rehabilitation unit, and to prepare a protocol for randomized  
33 control trial (RCT) implementation.

34  
35  
36  
37  
38 **Method and Analysis:** This single-blind RCT will recruit eighty 50–99-year-old clients admitted to  
39 the recovery rehabilitation unit who meet certain eligibility criteria. Clients will be randomly  
40 allocated to receive either occupational therapy with an adjusted challenge-skill balance process or  
41 standard occupational therapy. Both interventions will be carried out during clients' residence at the  
42 unit. Outcomes will be measured at entry to ("pre") and discharge from ("post") the unit, and then  
43 three months afterwards ("follow-up"). The primary outcome measure will be subjective quality of  
44 life.  
45  
46  
47  
48

49 **Ethics and Dissemination:** This protocol has been approved by the Ethics Review Committee of  
50 the Tokyo Metropolitan University (No.17020). Results of this trial will be submitted for  
51 publication in a peer-reviewed journal.  
52

53 **Trial registration:** University Hospital Medical Information Network 2017 UMIN000029505.  
54  
55  
56  
57  
58  
59  
60

## Strengths and limitations of this study

- This is the first prospective randomized controlled trial to verify the effect of Adjusting the challenge-skill balance for occupational therapy (ACS-OT) in the recovery rehabilitation unit.
- Verify whether the new occupational therapy process called ACS-OT is effective for subjective quality of life.
- The sample size is set appropriately by power analysis based on our previous research results.
- Stratified randomization is responsible for homogeneous assignment of experimental groups and control groups.
- It is impossible to blind implementers due to the nature of the intervention in occupational therapy process.
- Acute patients, subacute patients, outpatients, and clients who use community rehabilitation services are not included.

## Background

Rehabilitation aims to maximally promote the process of recovery from injury, illness, or disease, supporting the client to reach a normal condition. An occupational therapist is a health professional who aims to support the achievement of independence, meaning, and satisfaction in all aspects of people's lives. Likewise, occupational therapy is defined as a profession that promotes clients' health and wellbeing through client-centered practice. In many countries, client-centered practices are the basis for occupational therapy [1-5]. In saying this, within processes related to client-centered practice, there is a tendency to rely on the therapist's experience and values. It has been reported that there is a difference between the client's and therapist's perceptions of the activity engaged in by the client [6-7]. To support the activity desired by the client, we believe that it is necessary to obtain the client's evaluation of the activity, in a form that the client and the therapist can easily share. In addition, deterioration of the client's health condition, physical and mental functions, and loss of social role often causes decreased motivation to perform the activities [8-9]. Therefore, in occupational therapy, we consider that it is necessary for clients and therapists to easily share the meaning of activity, and to provide support that facilitates positive client mental state. To reflect this in our research, we decided to apply "flow," a concept that captures the psychological state of activity. Flow is defined as "the state in which people are so involved in an activity that nothing else seems to matter at the time; the experience is so enjoyable that people will do it even at great cost, for the sheer sake of doing it" [10]. With regard to research on flow in relation to the occupational therapy field, there have been reports of improved happiness, self-esteem, work productivity, and level of subjective wellbeing [11-16]. According to Csikszentmihalyi [10], flow can be explained according to the balance between challenge and skills; the "flow model." Flow is experienced when an individual's perception of the difficulty associated with an activity is balanced with their level of skill. In contrast, activities in which the individual's skill is perceived to be close to the difficulty associated with the activity leads to boredom. Similarly, conditions of low-perceived skill and high-perceived challenge produce anxiety, while conditions of low-perceived skill and low-perceived challenge result in apathy. Several research reports have analyzed the relationship between the flow model and health-related quality of life (QOL) [17-21]. In our research using the flow model, we analyzed activities supported by occupational therapy for the elderly using an adult day program, and showed that there was a difference in recognition [7]. In other words, even within conventional client-centered occupational therapy, there is a difference in recognition from the viewpoint of challenge and ability. Therefore, we believed that more effective occupational therapy could be provided by adjusting these, and invented a new process called adjusting the challenge-skill balance for occupational therapy (ACS-OT). A previous randomized controlled trial (RCT) on ACS-OT for the elderly using an adult day program showed improvements in health-related QOL [22]. To generalize the results of this research to various fields, it is necessary to develop research in this area. The purpose of this study is to verify the effect of ACS-OT in the recovery rehabilitation unit of Harue Hospital, Fukui, Japan, and to determine a protocol for RCT implementation.

## Method/design

### Design

This study has been designed as an RCT comparing occupational therapy with an adjusted challenge-skill balance process to standard occupational therapy. Clients 50–99 years old admitted to the recovery rehabilitation unit will be eligible for this study.

The primary outcome measure will be change in subjective QOL, which will be compared between the experimental and control groups. The secondary outcome measure will be change in flow experience, health-related QOL, and performance of activities of daily living.

### Feasibility of recruitment and sample size

Based on the results of a previous RCT in the field of occupational therapy, whose QOL effect size was 0.76 [22], we have conducted an a priori power analysis (using G\*power, version 3.1.7) [23] that assumed a medium-to-large effect size. The analysis indicated that a total sample size of 68 clients (34 in each of the two groups) would provide 80% power for detecting a difference, with an effect size of 0.7 in health-related QOL scores using a two-tailed test and an alpha level of 0.05. To compensate for possible loss, we have decided to enroll 80 clients. We aim to reach this in approximately one year.

### Randomization

As aforementioned, this study has been designed as a single-blind RCT that will be reported in accordance with the CONSORT guidelines [24] for reporting clinical trials. Clients will be randomly assigned by blocked randomization (block size four) to either the experimental or the control group. As the factors within the experimental and control groups affecting the outcome measures are homogeneous, randomization will be stratified by disease group (cerebrovascular disease/musculoskeletal disease) and a visual analog scale for the self-assessment of general health in EuroQol-5 Dimensions (EQ-5D) [EQ-VAS (high/low, boundary 50)] [25] will be performed, resulting in four layers: 1. cerebrovascular disease & high EQ-VAS; 2. cerebrovascular disease & low EQ-VAS; 3. musculoskeletal disease & high EQ-VAS; and 4. musculoskeletal disease & low EQ-VAS. Block order will be randomly assigned using computer-generated software (R. Ver. 3.2.1). The statistician will create a block random pattern for each layer, and will notify the occupational therapists of the assignment result. The clients will be blinded to group allocation, although the therapists will be aware of the treatment assigned. After the last outcome measurement point, each client will be asked if they know their assigned group.

## **Inclusion and exclusion criteria**

Inclusion criteria for this study will be clients with cerebrovascular or musculoskeletal disease admitted to the recovery rehabilitation unit of Harue Hospital, Fukui, Japan. Clients under the age of 50 years and older than 100 years at the time of their admission to the unit will be excluded from the study. In addition, clients whose Mini-Mental State Examination (MMSE) score is assessed as 23 points or less at their first occupational therapy appointment after admission to the unit will be excluded from the study [26].

## **Procedure**

### **Intervention**

In both the experimental and control groups, occupational therapy will be provided in accordance with the American Occupational Therapy Association guidelines [27]. The study intervention will be implemented by occupational therapists who are experienced (at least 200 work hours) in delivering treatment according to client-centered occupational therapy. Moreover, the therapists will be trained (at least 50 hours) on adjusting the challenge-skill balance process in occupational therapy. The occupational therapy program will focus on the occupational performance of activities and be conducted individually. The difference between the two groups will be whether the evaluation and intervention are conducted based on an appropriate challenge-skill balance. Treatment will consist of 40–60 minute sessions conducted six times per week. The implementation period will be from admission to the recovery rehabilitation unit to discharge.

### **Experimental group**

1. During the first session of occupational therapy, the therapist will assess the client's problems in activities of daily living using the Canadian Occupational Performance Measure [28]. Based on the problems identified, activities that could be supported by occupational therapy will be selected.
2. During the second session, the client will perform the selected activities, and will then be invited to evaluate the activities using the challenge and skill levels. "Challenge level" will be defined as the client's perception of the level of difficulty associated with the activity, and will be rated on a seven-point scale from "very simple" (1) to "very difficult" (7). "Skill level" will be defined as the client's perception of their skills in relation to the activity, and will be rated on a seven-point scale from "not at all" (1) to "very skillful" (7) [29-30]. At that time, the therapist will clarify with the client the reasons for their challenge and skill level ratings.
3. Based on the client's and therapist's evaluations, the factors that make the client's occupational performance difficult ("challenge components," such as environment, execution time, and size of the location in which the activity occurs) and factors that improve their occupational performance ("skill components," such as frequency, range, distance, accuracy, and dexterity) will be determined.
4. Based on these components, adjustments to the challenge-skill balance of the activities will occur. The criteria for judging that the challenge skill balance has been adjusted is defined in terms of the difference between the "challenge level" and "skill level" of occupational therapist and client is 1 or less respectively .

1  
2  
3  
4  
5  
6  
7  
8  
9  
10  
11  
12  
13  
14  
15  
16  
17  
18  
19  
20  
21  
22  
23  
24  
25  
26  
27  
28  
29  
30  
31  
32  
33  
34  
35  
36  
37  
38  
39  
40  
41  
42  
43  
44  
45  
46  
47  
48  
49  
50  
51  
52  
53  
54  
55  
56  
57  
58  
59  
60

5. After the client has performed the adjusted activities, the client's challenge-skill levels will then be re-evaluated. When the client's challenge-skill levels are balanced, interventions centered on the improvement of performance of the activities will commence. If the client's challenge-skill levels are not balanced, the activities will re-adjusted and the intervention will be started once the levels are balanced. The intervention will aim to improve the client's skill levels on the activities once their challenge-skill levels have been balanced.

6. This process will occur at least once a week.

### **Control group**

For the control group, the first and second sessions will be conducted the same as for the experimental group, except that the therapists will not be informed of the client's subjective perception of the challenge and skill levels for the activities. From the third session onwards, the therapists will simply assess the client's performance and conduct the therapy in a manner typical of occupational therapy, following the general guidelines for occupational therapy practice.

### **Outcomes**

As aforementioned, outcomes will be measured at entry to ("pre") and discharge from ("post") the unit, and three months afterwards ("follow-up"). The primary outcome measure will be subjective QOL. All outcomes to be measured are listed below.

#### ***Subjective quality of life (pre, post, and follow-up)***

Ikigai-9 is a self-assessed psychological measure of an individual's mental state (reason for living; ikigai) and QOL [31]. It consists of nine items, and a total score (nine–45 points) and three subscale scores (three–15 points each) are calculated.

#### ***Health-related quality of life (pre, post and follow-up)***

Health-related QOL will be assessed using the EQ-5D. The EQ-5D defines health along five dimensions (mobility, self-care, day-to-day activities, pain and discomfort, and anxiety or depression). The EQ-5D also has a visual analog scale (the EQ-VAS) that enables self-assessment on a scale from zero (worst possible health) to 100 (best possible health).

#### ***Flow experience (pre and post)***

Flow experience will be assessed using the Flow State Scale for Occupational Tasks [32], developed for clinical situations, which consists of 14 items and three factors (possible scores range from seven–98). The measure's reliability and validity have previously been confirmed [32].

#### ***Activities of daily life (pre and post)***

Activities of daily life will be measured using the Functional Independence Measure (FIM) [33]. The FIM is an 18-item, seven-level scale that uniformly assesses the severity of an individual's disability and medical rehabilitation functional outcome (possible scores range from seven–126).

#### ***Clinical global impression (post)***

The Clinical Global Impression (CGI) rating scales are measures of overall treatment improvement. The CGI is rated on a seven-point scale, with the severity of illness scale using a range of responses from one (very much improved) to seven (very much worse) [34]. The CGI is used to determine



1 Minimally Important Change (MIC) [35] in the main outcome.

### 2 ***Evaluation of implementation status for occupational therapy (post)***

3 Evaluation of ACS implementation status will be carried out by the occupational therapists. This  
4 evaluation is rated on a seven-point scale and consists of the following three items: 1. Ability to  
5 identify the difference in recognition about the activity between the client and the therapist; 2)  
6 Whether the differences in recognition between the client and the therapist were adjusted during  
7 occupational therapy; 3) Whether occupational therapy suitable for the client was provided.  
8  
9

### 10 **Organization**

11 A primary investigator will be responsible for the informed consent procedure, measurements,  
12 analysis, and study report. The primary investigator will be assisted by three research assistants.  
13 Data entry and control will be conducted by the research assistants under the supervision of the  
14 investigator. A statistician will be responsible for the data analysis.  
15  
16  
17  
18  
19  
20  
21  
22

### 23 **Statistical analysis**

24 All statistical analyses will be performed using SPSS Ver. 24.0 for Macintosh. Data will be entered  
25 into Microsoft Excel 2016 and subsequently exported into SPSS software for analysis. The analysis  
26 will be undertaken by the statistician, who will be blinded to the random assignment result. Baseline  
27 characteristics of the groups will be compared using Chi-square and independent t-tests for the  
28 categorical variables, and the Mann–Whitney U test for continuous variables. Primary analysis for  
29 this study will be undertaken using intention to treat principles.  
30  
31  
32

### 33 ***Generalized linear mixed model***

34 Each continuous outcome variable will be analyzed using a generalized linear mixed model  
35 (GLMM) fitted with a maximum likelihood estimation. We will include the following as fixed  
36 effects: group allocation (experimental or control group), time (pre, post, or three-month follow-up),  
37 and the interaction of group and time. In addition, we will include the participants as a random  
38 effect. All confidence intervals will be provided with 95% margins.  
39  
40

### 41 ***Analysis of covariance***

42 Treatment differences between the three timepoints (pre and post, pre and three-month follow-up,  
43 and post and three-month follow-up) will be evaluated using analysis of covariance (ANCOVA),  
44 with the pre-test scores on the Ikigai-9 and the EQ-5D as covariates. This analysis is regarded as a  
45 post hoc test after the implementation of the GLMM. The ANCOVA will also use an analysis of the  
46 FIM and EQVAS scores between the pre and post timepoints. For all tests, a two-sided significance  
47 level of  $< 0.05$  will be used. We will also report significance according to Benjamini and Hochberg's  
48 method [36] regarding the adjustment of the overall score as a false discovery rate.  
49  
50

51 Between-groups effect sizes will be calculated as standardized mean differences (Cohen's  $d$ ).

### 52 ***Minimal importance change***

53 Minimal importance change (MIC) for each outcome will be calculated using the anchor-based  
54 method [37]. The area under the receiver operating characteristic curve will be able to identify the  
55  
56  
57  
58  
59  
60

1  
2 cut - off point on the CGI scores that most optimally distinguishes between CGI scores of minimal  
3 improvement (one–three) and scores of no difference (four–seven). The cut - off will be used to  
4 provide an MIC estimate that will maximize the Youden J statistic: sensitivity - (one - specificity)  
5 [38].  
6

### 7 ***Cost-effectiveness***

8  
9 A cost-effectiveness analysis will be performed using total cost and quality-adjusted life years  
10 (QALYs) based on the index value of EQ-5D, and incremental cost-effectiveness ratios (ICERs)  
11 will be calculated based on comparisons of the experimental and control groups. Total cost will be  
12 converted to US dollars using the average currency exchange rate at the time of data analysis. The  
13 ICER will be estimated using the following equation:  $ICER = [\mu C_e - \mu C_c] / [\mu E_e - \mu E_c]$ , where  $\mu C$   
14 and  $\mu E$  represent the mean cost and mean QALY for the experimental and control groups,  
15 respectively. To account for the uncertainty of ICER, the bootstrap method (1000 times) will be  
16 used to calculate the mean values [39].  
17  
18  
19  
20  
21  
22

### 23 **Ethics**

24 This protocol has been approved by the Ethics Review Committee of the Tokyo Metropolitan  
25 University (No.17020).  
26  
27  
28  
29

### 30 **Discussion**

31 This research protocol has been prepared to examine the effect of adjusting the challenge-skill  
32 balance process in occupational therapy on subjective QOL of clients in a recovery rehabilitation  
33 unit, using an RCT. The main purpose of occupational therapy is to make it possible for clients to  
34 participate in the activities of daily life that they desire. To achieve this, practical models such as  
35 the Canadian Model of Occupational Performance [40] and Model of Human Occupation [41] are  
36 advocated. On the other hand, Maitra [6] conducted a questionnaire survey and reported that there  
37 was a difference in perception between the occupational therapist and the client, even though it  
38 seemed that the therapist had provided client-centered occupational therapy. Thus, it is necessary to  
39 facilitate the sharing of the meaning of “occupation” between the therapist and the client, in order to  
40 understand and support the client’s desired activities. The process used in this study was devised  
41 based on the flow model and shares perception of the activities between client and occupational  
42 therapist, as well as highlighting the importance of the provision of appropriate activities for clients.  
43 The client’s perception of their challenge-skill balance is highly relevant to the degree of difficulty  
44 and occupational performance of activities provided by occupational therapy. We believe that  
45 understanding the client’s subjective assessment of their activities, according to their challenge-skill  
46 balance, supports the provision of effective occupational therapy.  
47  
48  
49  
50  
51  
52  
53

54 This study has been designed as an RCT. To verify the effect on this occupational therapy process,  
55 we believe that this research design is necessary to more clearly show the effect of the intervention.  
56 In addition, we aim to homogenize the two groups by stratified blocking using disease and  
57  
58  
59  
60

1 subjective health. We have not set strict age limits as inclusion criteria, as this process is assumed to  
2 be adaptable to clients of a wide range of ages.

3  
4 A previous RCT that used a similar protocol for older adults in an adult day program resulted in  
5 improved health-related QOL [22]. However, in this study design, only one activity was focused  
6 and a follow-up period was not set. This protocol will cover several activities with which clients  
7 require assistance during admission to a recovery rehabilitation unit. Furthermore, by setting the  
8 follow-up period, we will verify the continuity of the effect in addition to the direct effect of  
9 ACS-OT implementation. We hypothesize that ACS-OT will enhance the effects of positive  
10 emotions and self-affirmation by facilitating activities suitable for clients, and as such subjective  
11 QOL according to the Ikigai-9 has been adopted as the main outcome. This suggests that  
12 occupational therapy may yield new findings on the effect on subjective QOL. In addition, by using  
13 a GLMM, it will be possible to perform an analysis that considers individual differences as a  
14 random effect.  
15  
16  
17  
18  
19  
20  
21  
22

### 23 **Study limitations**

24 In the effectiveness verification in the recovery rehabilitation unit, there is a high possibility that  
25 there will be a positive influence on the outcome as conditions improve in the control group, as well  
26 as in the experiment group [42-43]. Therefore, there may be no clear difference between the two  
27 groups. For example, the ADL score can probably be expected to improve in the two groups.  
28 Taking these into consideration, the main outcome measure of subjective QOL has been selected,  
29 which is expected to be most effective. While subjective evaluations such as subjective QOL,  
30 health-related QOL, and flow experience is highly likely to result in measurement bias. With regard  
31 to this point, we will devise measures to reduce this bias as much as possible, by adopting an RCT  
32 design and carrying out self-assessed outcome measurements.  
33  
34  
35  
36

37 Also, since the frequency of ACS implementation in the experiment group in this study is about  
38 once a week, thereon in, there may be cases where the effect of the intervention is not maintained  
39 throughout the support period. In addition, there are concerns that the adjustment process may not  
40 be able to function sufficiently if there are multiple activities to support, and when a client's  
41 activities are frequently changed according to their recovery stage. Furthermore, an occupational  
42 therapist who has experienced the adjustment process may inadvertently provide similar support to  
43 the control group as the experiment group. If that were to happen, the differences between the  
44 experimental and control groups may be inconspicuous.  
45  
46  
47

48 We will use a convenience sample from the recovery rehabilitation unit of a single hospital, which  
49 may not be representative of all clients in a recovery rehabilitation unit. This study will not include  
50 acute patients, subacute patients, outpatients, and clients who use community rehabilitation services.  
51 Therefore, our results will not be able to be generalized to these populations. In view of these  
52 limitations, we will comply with the protocol and show the effect of adjusting the challenge-skill  
53 balance process.  
54  
55  
56  
57  
58  
59  
60

## Conclusions

In the occupational therapy process, it is important to share the perceptions between occupational therapists and clients, and provide appropriate assistance to the clients. Therefore, We believe that it is useful to verify the effect of adjusting the challenge-skill balance process for occupational therapy by conducting an RCT. This research will aim to contribute to the development of a more effective occupational therapy process that leads to improvements in clients' subjective QOL, in addition to improving their activities of daily living and health-related QOL.

## Reference

1. Law, M. C. (Ed.). (1998). *Client centered occupational therapy*. Slack Incorporated.
2. Fearing, V. G., & Clark, J. (Eds.). (2000). *Individuals in context: A practical guide to client-centered practice*. Slack Incorporated.
3. Townsend, E., & Wilcock, A. (2004). Occupational justice and client-centred practice: A dialogue in progress. *Canadian journal of occupational therapy*, 71(2), 75-87.
4. Sumsion, T., & Law, M. (2006). A review of evidence on the conceptual elements informing client-centred practice. *Canadian Journal of Occupational Therapy*, 73(3), 153-162.
5. Whalley Hammell, K. R. (2015). Client-centred occupational therapy: the importance of critical perspectives. *Scandinavian journal of occupational therapy*, 22(4), 237-243.
6. Maitra KK, Erway F. Perception of client-centered practice in occupational therapists and their clients. *American Journal of Occupational Therapy*.2006;60(3):298-310.
7. Yoshida I, Mima H, Nonaka T, Kobayashi R, Hirao K. Analysis of subjective evaluation in occupations of the elderly: A study based on the flow model (in Japanese).*The Journal of Japanese Occupational Therapy Association*. 2016;35(2):70-79.
8. Vallerand, R. J., & O'Connor, B. P. (1989). Motivation in the elderly: A theoretical framework and some promising findings. *Canadian Psychology/Psychologie canadienne*, 30(3), 538.
9. Krause, N. (1994). Stressors in salient social roles and well-being in later life. *Journal of Gerontology*, 49(3), P137-P148.
10. Csikszentmihalyi M. Play and intrinsic rewards. *Journal of humanistic psychology*;1975.
11. Csikszentmihalyi M, Csikszentmihalyi IS, editors. *Optimal experience: Psychological studies of flow in consciousness*. Cambridge university press;1992.
12. Haworth J, Evans S. Challenge, skill and positive subjective states in the daily life of a sample of YTS students. *Journal of Occupational and Organizational Psychology*. 1995;68(2):109-121.
13. Nielsen K, Cleal B. Predicting flow at work: Investigating the activities and job characteristics that predict flow states at work. *Journal of Occupational Health Psychology*.2010;15(2):180-190.
14. Larson E, von Eye A. Beyond flow: temporality and participation in everyday activities. *American Journal of Occupational Therapy*.2010;64(1):152-163.

15. Rebeiro KL, Polgar JM. Enabling occupational performance: optimal experiences in therapy. *Canadian Journal of Occupational Therapy*. 1999;66(1):14-22.
16. Wright JJ, Sadlo G, Stew G. Further explorations into the conundrum of flow process. *Journal of Occupational Science*. 2007;14(3):136-144.
17. Hirao K, Kobayashi R, Okishima K, Tomokuni Y. Flow experience and health-related quality of life in community dwelling elderly Japanese. *Nursing & health sciences*. 2012;14(1): 52-57.
18. Yasunaga M, Kobayashi N, Yamada T. The challenge skill ratio of users' experiences at an adult daycare center: Emotional states based on the Flow model (in Japanese). *The Journal of Japanese Occupational Therapy Association*. 2012;31(1):83-93.
19. Massimini, F., Csikszentmihalyi, M., & Carli, M. (1987). The Monitoring of Optimal Experience A Tool for Psychiatric Rehabilitation. *The Journal of Nervous and Mental Disease*, 175(9), 545-549.
20. Moneta, G. B., & Csikszentmihalyi, M. (1996). The effect of perceived challenges and skills on the quality of subjective experience. *Journal of personality*, 64(2), 275-310.
21. Novak, T. P., & Hoffman, D. L. (1997). Measuring the flow experience among web users. *Interval Research Corporation*, 31, 1-36.
22. Yoshida I, Hirao K, Nonaka T. Adjusting Challenge–Skill Balance to Improve Quality of Life in Older Adults: A Randomized Controlled Trial. *American Journal of Occupational Therapy*. 2018; 72:1-8.
23. Erdfelder, E., Faul, F., & Buchner, A. (1996). GPOWER: A general power analysis program. *Behavior research methods, instruments, & computers*, 28(1), 1-11.
24. Schulz, K. F., Altman, D. G., & Moher, D. (2010). CONSORT 2010 statement: updated guidelines for reporting parallel group randomized trials. *Annals of internal medicine*, 152(11), 726-732.
25. EuroQol, G. (1990). EuroQol-a new facility for the measurement of health-related quality of life. *Health policy*, 16(3), 199-208.
26. Anthony, J. C., LeResche, L., Niaz, U., Von Korff, M. R., & Folstein, M. F. (1982). Limits of the 'Mini-Mental State' as a screening test for dementia and delirium among hospital patients. *Psychological medicine*, 12(2), 397-408.
27. American Occupational Therapy Association. (2014). Occupational therapy practice framework: Domain and process (3rd ed.). *American Journal of Occupational Therapy*, 68, S1-S48.
28. Law, M., Baptiste, S., McColl, M., Opzoomer, A., Polatajko, H., & Pollock, N. (1990). The Canadian occupational performance measure: an outcome measure for occupational therapy. *Canadian Journal of Occupational Therapy*, 57(2), 82-87.
29. Csikszentmihalyi M, Larson R. *Being adolescent: Conflict and growth in the teenage years*. Basic Books;1986.
30. Engeser S, Rheinberg F. Flow, moderators of challenge-skill-balance and performance. *Motivation and Emotion*. 2008;32(3):158-172.

- 1  
2 31. Imai T, Osada H, Nishimura Y. The reliability and validity of a new scale for measuring the  
3 concept of Ikigai (Ikigai-9) (in Japanese). *Japanese Journal of Public Health*.  
4 2012;59(7):433-439.
- 5  
6 32. Yoshida K, Asakawa K, Yamauchi T, Sakuraba S, Sawamura D, Murakami Y, et al. The flow  
7 state scale for occupational tasks: development, reliability, and validity. *Hong Kong Journal of*  
8 *Occupational Therapy*.2013;23(2):54-61.
- 9  
10 33. Granger CV, Hamilton BB, Keith RA, Zielesny M, Sherwin FS. Advances in functional  
11 assessment for medical rehabilitation. *Topics in geriatric rehabilitation*.1986;1(3):59-74.
- 12  
13 34. Guy, W. (1976). Clinical global impression scale. The ECDEU Assessment Manual for  
14 Psychopharmacology-Revised Volume DHEW Publ No ADM, 76(338), 218-222.
- 15  
16 35. Benjamini, Y., & Hochberg, Y. (1995). Controlling the false discovery rate: a practical and  
17 powerful approach to multiple testing. *Journal of the royal statistical society. Series B*  
18 *(Methodological)*, 289-300.
- 19  
20 36. Crosby, R. D., Kolotkin, R. L., & Williams, G. R. (2003). Defining clinically meaningful  
21 change in health-related quality of life. *Journal of clinical epidemiology*, 56(5), 395-40
- 22  
23 37. de Vet, H. C., Ostelo, R. W., Terwee, C. B., van der Roer, N., Knol, D. L., Beckerman, H., ... &  
24 Bouter, L. M. (2007). Minimally important change determined by a visual method integrating  
25 an anchor-based and a distribution-based approach. *Quality of life research*, 16(1), 131.
- 26  
27 38. Youden, W. J. (1950). Index for rating diagnostic tests. *Cancer*, 3(1), 32-35.
- 28  
29 39. Briggs, A. H., Wonderling, D. E., & Mooney, C. Z. (1997). Pulling cost-effectiveness analysis  
30 up by its bootstraps: A non-parametric approach to confidence interval estimation. *Health*  
31 *economics*, 6(4), 327-340.
- 32  
33 40. Boniface, G, Fedden T, Hurst H, Mason M, Phelps C, Reagon C, et al. Using theory to  
34 underpin an integrated occupational therapy service through the Canadian Model of  
35 Occupational Performance. *British Journal of Occupational Therapy*, 2008;71(12):531-539.
- 36  
37 41. Kielhofner G, editors. *Model of human occupation: Theory and application*. Lippincott  
38 Williams & Wilkins; 2008.
- 39  
40 42. Tomori K, Nagayama H, Ohno K, Nagatani R, Saito Y, Takahashi K, et al. Comparison of  
41 occupation-based and impairment-based occupational therapy for subacute stroke: A  
42 randomized controlled feasibility study. *Clinical rehabilitation*. 2015;29(8):752-762.
- 43  
44 43. Noto S, Murai C, Takeuchi S, Nakamura H. Effect of occupational therapy using " the  
45 management tool for daily life performance" for dependent community-dwelling elderly: A  
46 randomized controlled multi-center trial (in Japanese).*The Journal of Japanese Occupational*  
47 *Therapy Association*.2014;33(3):259-269.
- 48  
49  
50  
51  
52  
53  
54  
55  
56  
57  
58  
59

**Footnotes**

**Contributors:** IY conceived the idea and drafted the protocol. KH, RK reviewed and edited the protocol. IY drafted the manuscript and KH, RK reviewed and revised. All authors approved the final version for submission.

**Funding:** None declared.

**Competing interests:** None declared.

For peer review only

# BMJ Open

## Effect of adjusting the challenge–skill balance for occupational therapy: study protocol for a randomized controlled trial

|                                 |                                                                                                                                                                                                                                                                                                                                                                                             |
|---------------------------------|---------------------------------------------------------------------------------------------------------------------------------------------------------------------------------------------------------------------------------------------------------------------------------------------------------------------------------------------------------------------------------------------|
| Journal:                        | <i>BMJ Open</i>                                                                                                                                                                                                                                                                                                                                                                             |
| Manuscript ID                   | bmjopen-2018-022438.R1                                                                                                                                                                                                                                                                                                                                                                      |
| Article Type:                   | Protocol                                                                                                                                                                                                                                                                                                                                                                                    |
| Date Submitted by the Author:   | 04-Oct-2018                                                                                                                                                                                                                                                                                                                                                                                 |
| Complete List of Authors:       | Yoshida, Ippei; Tokyo Metropolitan University Graduate School of Human Health Sciences, Department of Occupational Therapy; Harue hospital, Department of Rehabilitation<br>Hirao, Kazuki; Kibi International University Graduate School of Health Sciences<br>Kobayashi, Ryuji; Tokyo Metropolitan University Graduate School of Human Health Sciences, Department of Occupational Therapy |
| <b>Primary Subject Heading</b>: | Rehabilitation medicine                                                                                                                                                                                                                                                                                                                                                                     |
| Secondary Subject Heading:      | Evidence based practice, Health services research, Patient-centred medicine                                                                                                                                                                                                                                                                                                                 |
| Keywords:                       | REHABILITATION MEDICINE, Occupational therapy, Flow model, Randomized control trial                                                                                                                                                                                                                                                                                                         |
|                                 |                                                                                                                                                                                                                                                                                                                                                                                             |

SCHOLARONE™  
Manuscripts



1 **Effect of adjusting the challenge–skill balance for occupational therapy: study protocol for a**  
2 **randomized controlled trial**

3  
4  
5  
6  
7  
8 A. Ippei Yoshida, Kazuki Hirao, Ryuji Kobayashi

9  
10 B. Ippei Yoshida, Tokyo Metropolitan University Graduate School of Human Health Sciences,  
11 Department of Occupational Therapy; Harue hospital, Department of Rehabilitation.

12  
13 7-2-10, Higashi-Ogu, Arakawa-ku, Tokyo, Japan 116-8551.

14  
15 e-mail; ippei.i.yoshi@gmail.com, TEL; +81-3-3819-1211. FAX; +81-3-3892-2248.

16  
17  
18 C. Kazuki Hirao, Kibi International University Graduate School of Health Sciences, Okayama,  
19 Japan.

20  
21 Ryuji Kobayashi, Tokyo Metropolitan University Graduate School of Human Health Sciences,  
22 Department of Occupational Therapy, Tokyo, Japan.

23  
24 D. REHABILITATION MEDICINE, Occupational therapy, Flow model, Randomized control trial

25  
26 E. Word count: 3839

27  
28  
29  
30  
31  
32  
33  
34 Correspondence to

35  
36 Ippei Yoshida; ippei.i.yoshi@gmail.com

37  
38  
39  
40  
41 **Abstract**

42 **Introduction:** Occupational therapy (OT) is defined as the promotion of client health and  
43 well-being through a client-centered practice. However, there is a tendency to rely on the therapist's  
44 experiences and values, and there is a difference between the client's and therapist's perceptions  
45 regarding the current activity that the client is engaged in. In previous studies that have applied  
46 "flow," activities supported by OT in elderly people were analyzed, indicating a difference in  
47 recognition. Therefore, we thought that more effective OT could be implemented by adjusting the  
48 challenge–skill balance, and we invented a novel process termed as adjusting the challenge–skill  
49  
50  
51  
52  
53  
54  
55  
56  
57  
58  
59  
60

1 balance for OT (ACS-OT). The purpose of this study is to verify the effect of ACS-OT on clients in  
2 the recovery rehabilitation unit and to prepare a protocol for randomized control trial (RCT)  
3 implementation.

4 **Method and Analysis:** This single-blind RCT will recruit 80 50–99-year-old clients admitted to the  
5 recovery rehabilitation unit who meet eligibility criteria. Clients will be randomly allocated to  
6 receive ACS-OT or standard OT. Both interventions will be performed during the clients' residence  
7 at the unit. The primary outcome measure will be subjective quality of life and will be measured at  
8 entry into (pre) and at discharge from (post) the unit and at 3 months afterwards (follow-up).  
9 Outcomes will be analyzed using a generalized linear mixed model fitted with a maximum  
10 likelihood estimation.

11 **Ethics and Dissemination:** This protocol has been approved by the ethics review committee of the  
12 Tokyo Metropolitan University (No.17020). Results of this trial will be submitted for publication in  
13 a peer-reviewed journal.

14 **Registration:** University Hospital Medical Information Network 2017 UMIN000029505.  
15 Registered on October 11, 2017.

1  
2  
3  
4  
5  
6  
7  
8  
9  
10  
11  
12  
13  
14  
15  
16  
17  
18  
19  
20  
21  
22  
23  
24  
25  
26  
27  
28  
29  
30  
31  
32  
33  
34  
35  
36  
37  
38  
39  
40  
41  
42  
43  
44  
45  
46  
47  
48  
49  
50  
51  
52  
53  
54  
55  
56  
57  
58  
59  
60

## 1 **Strengths and limitations of this study**

- 2 • This is the first prospective randomized controlled trial (RCT) to verify the effect of a new  
3 occupational therapy (OT) process termed as adjusting the challenge–skill balance for OT  
4 (ACS-OT) in the recovery rehabilitation unit.
- 5 • We designed a RCT to verify if ACS-OT is effective in improving subjective quality of life.
- 6 • Stratified randomization is responsible for homogeneous assignment of experimental group  
7 and control group.
- 8 • Outcomes analysis using clients as random effect by linear mixed model.
- 9 • It is impossible to blind the therapists because of the nature of intervention in the OT process.
- 10 • Patients with acute and subacute conditions, outpatients, and clients who use community  
11 rehabilitation services will be excluded.

## 1 **Background**

2 Rehabilitation aims to maximally promote the process of recovery from injury, illness, or disease,  
3 supporting the client to reach a normal condition. An occupational therapist is a health professional  
4 who aims to support the client to return to independence, meaning, satisfaction in all aspects of  
5 people's lives. Likewise, occupational therapy (OT) is defined as a profession that promotes clients'  
6 health and well-being through a client-centered practice. In many countries, client-centered practice  
7 is the basis for OT; this practice contributes to the realization of meaningful activities for the client  
8 [1-5], which are defined as familiar activities which aligns with an individual's pursuit of valued  
9 developmental goals to maintain a personally meaningful lifestyle [6-7]. In saying this, within  
10 processes related to a client-centered practice, there is a tendency to rely on the therapist's  
11 experience and values. There is a difference between the client's and therapist's perceptions  
12 regarding the activity engaged in by the client [8-9]. To support the activity *desired* by the client, it  
13 is necessary to determine the client's evaluation of the activity in a form that the client and the  
14 therapist can easily share. In addition, deterioration of the client's health and physical and mental  
15 functions, and loss of social role often causes decreased motivation to perform these activities  
16 [10-11]. Therefore, in OT, it is necessary for clients and therapists to easily share the meaning of  
17 activity and to provide support that facilitates positive client mental state. To reflect this in our  
18 research, we applied the concept of "flow," which captures the psychological state of a particular  
19 activity. Flow is defined as "the state in which people are so involved in an activity that nothing else  
20 seems to matter at the time; the experience is so enjoyable that people will do it even at great cost,  
21 for the sheer sake of doing it" [12]. With regards to research on flow in the OT field, there have  
22 been reports on improved happiness, self-esteem, work productivity, and subjective well-being  
23 level [13-18]. According to Csikszentmihalyi [12], flow can be explained according to the balance  
24 between challenge and skills, i.e., the "flow model." Flow is experienced when an individual's  
25 perception of the difficulty associated with an activity is balanced with their level of skill.  
26 Conversely, activities in which the individual's skill is perceived to be too close to the difficulty

1 associated with the activity leads to boredom. Similarly, conditions of low-perceived skill in a  
2 high-perceived challenge result anxiety, whereas conditions of low-perceived skill and  
3 low-perceived challenge result in apathy. Several cross-sectional studies using the flow model have  
4 been reported [19-23]. In our previous research using the flow model to shape the OT practice,  
5 although the occupational therapist judged the activity to be suitable for the clients, clients  
6 themselves felt that the activity made them feel anxious, bored, and apathetic [9].

7 We believe that more effective OT and realization of meaningful activities for clients could be  
8 provided by adjusting the challenge–skill balance. Therefore, we invented a new process called  
9 adjusting the challenge–skill balance for OT (ACS-OT). A randomized controlled trial (RCT)  
10 conducted using ACS-OT for the elderly in an adult day program showed improvements in  
11 health-related quality of life (QOL) [24]. However, this previous research only tested one activity,  
12 which limits the generalization of the effect of ACS-OT on the larger population and to different  
13 activities. Therefore, we propose to examine the effect of ACS-OT on clients in the recovery phase  
14 who need timely support on activities of daily living (ADL) and occupational performance  
15 necessary to return to their home life. To test this, we plan to employ ACS-OT in the recovery  
16 rehabilitation unit of Harue Hospital, Fukui, Japan, and to determine a protocol for RCT  
17 implementation.

## 19 **Method and Analysis**

20 This study is designed as RCT for comparing ACS-OT with standard occupational therapy (control).  
21 To minimize heterogeneity of the client sample, we will test clients aged 50–99 years old admitted  
22 to the recovery rehabilitation unit. This age range was chosen as the average age of patients  
23 admitted is  $76.8 \pm 12.7$  years, and we extended the target age range to  $\pm 2$  standard deviations. As  
24 discussed in a previous review [25], this study represents the practice of client-centered OT,  
25 focusing on ADL and occupational performance. To determine if ACS-OT could be effective with  
26 various diseases, we targeted cerebrovascular and musculoskeletal disease, which are the main

1 diseases observed at our recovery rehabilitation unit. The average admission period in this unit is 8–  
2 10 weeks for cerebrovascular disease and 6–8 weeks for musculoskeletal disease. The intervention  
3 period in this study is set to 6–10 weeks, and the number of interventions would be 36–60. The  
4 primary outcome measure will be change in subjective QOL, which will be compared between the  
5 experimental and control groups. The secondary outcome measure will be change in flow  
6 experience, health-related QOL, and performance of ADL. A SPIRIT diagram detailing the timing  
7 of enrolment, interventions and assessments is provided in figure 1.

### 9 **Feasibility of recruitment and sample size**

10 We conducted an a priori power analysis (using G\*power, version 3.1.7) [26] that assumed a  
11 medium-to-large effect size based on the results of a previous RCT in the field of OT with an effect  
12 size of 0.76 [24]. The analysis indicated that a total sample size of 68 clients (34 in each group)  
13 would provide 80% power for detecting a difference, with an effect size of 0.7 for health-related  
14 QOL scores using a two-tailed test and an alpha level of 0.05. To compensate for client drop out,  
15 we will recruit 80 clients. We aim to finish this recruitment in 1 year.

### 17 **Randomization**

18 This study is designed as a single-blind RCT that will be reported in accordance with the Standard  
19 Protocol Items: Recommendations for Interventional Trials (SPIRIT) statement [27] for reporting  
20 clinical trials. Clients will be randomly assigned by blocked randomization (block size four) to the  
21 experimental or control groups. As the factors within the experimental and control groups affecting  
22 the outcome measures are homogeneous, randomization will be stratified by the disease group  
23 (cerebrovascular/musculoskeletal disease) and a visual analog scale for self-assessment of general  
24 health in EuroQol-5 Dimensions (EQ-5D) [EQ-VAS (high/low, boundary 50)] [28] will be used,  
25 resulting in four layers: 1. cerebrovascular disease and high EQ-VAS, 2. cerebrovascular disease  
26 and low EQ-VAS, 3. musculoskeletal disease and high EQ-VAS, and 4. musculoskeletal disease

1 and low EQ-VAS. Block order will be randomly assigned using computer-generated software (R.  
2 Ver. 3.2.1). Our statistician will create a block random pattern of each layer, but the grouping will  
3 be single-blinded. On the basis of the calculated random pattern, the assignment will be known to  
4 the occupational therapist. We intend to individually randomize patients in this research, and we use  
5 a dedicated process support application in the experimental group, but not in the control group.  
6 Therefore, there is almost no possibility of contamination between the two groups. The clients will  
7 be blinded to group allocation, although the therapists will be aware of the treatment group assigned.  
8 After the last outcome measurement point, each client will be asked to guess their assigned group.

9

### 10 **Inclusion and exclusion criteria**

11 Inclusion criteria for this study will be clients with cerebrovascular or musculoskeletal disease  
12 admitted to the recovery rehabilitation unit of the Harue Hospital, Fukui, Japan. Clients aged <50  
13 years and >100 years at the time of their admission to the unit will be excluded from the study. In  
14 addition, clients whose Mini-Mental State Examination score is assessed as  $\leq 23$  points at their first  
15 OT appointment after admission to the unit will be excluded from the study [29]. The exclusion  
16 criteria are transfer of the patient to another unit, another hospital, or death.

17

### 18 **Patient and Public Involvement statement**

19 All recruited clients will need to provide written, informed consent. The clients will be not involved  
20 in the recruitment to and conduct of this study. We have designed the study to minimize client time  
21 and physical restrictions; all participants are free to withdraw from the study at any time. Structural  
22 evaluation on client's burden in RCTs will be not performed. We will inform the results to the  
23 applicants.

24

### 25 **Procedure**

### 26 **Intervention**

27

28

29

30

1 In the experimental and control groups, OT will be provided in accordance with the American  
2 Occupational Therapy Association guidelines [30]. The study intervention will be implemented by  
3 occupational therapists who have at least 200 work h of experience in delivering treatment  
4 according to client-centered OT. Moreover, therapists will be trained for at least 50 h on ACS-OT.  
5 The standard OT program will focus on the occupational performance of activities and be  
6 conducted individually with each client. Treatment will consist of 40–60-min sessions, conducted  
7 six times per week. The implementation period will be from admission to discharge.

### 9 **Experimental group**

10 In the experimental group, we used our own custom application program designed to run on a  
11 mobile device to control the following processes.

- 12 1. During the first session of OT, the therapist will assess the client's problems with ADL using  
13 the Canadian Occupational Performance Measure [31]. Based on the problems identified,  
14 activities that could be supported by OT will be identified.
- 15 2. During the second session, the client will perform the selected activities and will be invited to  
16 evaluate the activities using the challenge and skill levels assessment. The "challenge level" will  
17 be defined as the client's perception of the level of difficulty associated with the activity and  
18 will be rated on a seven-point scale from "very simple" (1) to "very difficult" (7). The "skill  
19 level" will be defined as the client's perception of their own skills in relation to the activity and  
20 will be rated on a seven-point scale from "not at all" (1) to "very skillful" (7) [32-33]. At that  
21 time, the therapist will clarify with the client regarding reasons for their challenge and skill level  
22 ratings.
- 23 3. Based on the client's and therapist's evaluations, the factors which make the client's  
24 occupational performance more difficult (challenge components, such as environment,  
25 execution time, and movement range required for activity) and factors that improve their  
26 occupational performance (skill components, such as frequency, range, distance, accuracy, and



dexterity) will be determined. In the experimental group, the compensation approach, such as environmental adjustment and use of technical aid, will be used for adjusting the challenge level.

4. Based on these components and traditional assessment and activity analysis, the occupational therapist will reconfigure the activity contents after adjusting the challenge–skill balance. The criteria for judging that the challenge–skill balance has been adjusted is defined in terms of the difference between the “challenge level” and “skill level” set by occupational therapist and client, which is 1 or less, respectively. For example, regarding activity on bathing, if the occupational therapist evaluates challenge level to 4, skill level to 5 and the client himself evaluates challenge level to 4, skill level to 4, we judge that it is adjusted. If the occupational therapist evaluates challenge level to 4, skill level to 4, and the client himself evaluates challenge level to 4, skill level to 2, it judges that it is not adjusted.
5. After the client has performed the adjusted activities, the client’s challenge–skill levels will be re-evaluated. When the client’s challenge–skill levels are determined to be balanced, interventions centered on the improvement of performance of the activities will commence. If the client’s challenge–skill levels are not balanced, the activities will then be re-adjusted, and the intervention will start once the levels are balanced. The intervention will aim to improve the client’s skill levels on the activities once their challenge–skill levels have been balanced.
6. This re-assessment process will occur at least once a week.

### **Control group**

For the control group, the first and second sessions will be conducted similar to that conducted for the experimental group, except that the therapists will not be informed of the client’s subjective perception of the challenge and skill levels for the activities. From the third session onwards, the therapists will simply assess the client’s performance and conduct the therapy in a manner typical of OT, following the general guidelines for OT practice.

1

## 2 **Outcomes**

3 Outcomes will be measured at entry (pre) and discharge from the unit (post) and at 3 months  
4 afterwards (follow-up). The primary outcome measure will be subjective QOL. All outcomes to be  
5 measured are listed below:

### 6 ***Subjective quality of life (pre, post, and follow-up)***

7 Ikigai-9 is a self-assessed psychological instrument for measuring an individual's mental state  
8 (reason for living; ikigai) and QOL [34]. It comprises nine items; a total score (9–45 points) and  
9 three subscale scores (of 15 points each) are calculated.

### 10 ***Health-related quality of life (pre, post, and follow-up)***

11 Health-related QOL will be assessed using the EQ-5D. The EQ-5D defines health-related QOL with  
12 five dimensions: mobility, self-care, day-to-day activities, pain and discomfort, and anxiety or  
13 depression [28]. The EQ-5D also has a visual analog scale (EQ-VAS) that enables self-assessment  
14 on a scale from 0 (worst possible health) to 100 (best possible health).

### 15 ***Flow experience (pre and post)***

16 Flow experience will be assessed using the Flow State Scale for Occupational Tasks [35],  
17 developed for clinical situations. Since the Flow state scale for occupational task in this study is to  
18 be carried out for occupational therapy in the recovery rehabilitation unit, this evaluation is not  
19 carried out at follow-up (after discharge). This consists of 14 items and three factors. The items  
20 were measured on a seven-point scale ranging from “strong disagreement” (1) to “strong agreement”  
21 (7), with possible scores ranging from 7 to 98.

### 22 ***Activities of daily living (pre and post)***

23 ADL will be measured using the Functional Independence Measure (FIM) [36]. FIM is assessed by  
24 occupational therapist during admission to the recovery rehabilitation unit, and not implemented at  
25 follow-up. FIM is an 18-item, seven-level scale that uniformly assesses the severity of an

1 individual's disability and medical rehabilitation functional outcome. The range of values for FIM  
2 is from 18 (dependent) to 126 (fully independent).

### 3 ***Clinical global impression (post)***

4 The Clinical Global Impression (CGI) rating scales are measures of overall treatment improvement.  
5 CGI is rated on a seven-point scale, with the severity of illness scale using a range of responses  
6 from 1 indicating "very much improved" to 7 indicating "very much worse" [37]. CGI is used for  
7 determining the minimally important change (MIC) [38] in the main outcome (QOL).

### 8 ***ACS implementation status for occupational therapy (post)***

9 Evaluation of ACS implementation status will be conducted by the occupational therapists. This  
10 evaluation method was prepared for this research to verify whether the experimental process is  
11 feasible. This evaluation is rated on a seven-point scale from "very poor" (1) to "excellent" (7) and  
12 consists of the following three items: 1) Whether differences in recognition between the client and  
13 the therapist were confirmed, 2) whether differences in recognition between the client and the  
14 therapist were adjusted during OT, and 3) whether OT suitable for the client was provided. The  
15 occupational therapist will fill out this evaluation following each interventional session with a  
16 client.

### 17 18 **Statistical analysis**

19 All statistical analyses will be performed using SPSS Ver. 24.0 for Macintosh (SPSS, Chicago, IL,  
20 USA). Data will be de-identified and entered into Microsoft Excel 2016 and subsequently exported  
21 into SPSS software for analysis. The analysis will be performed by the statistician who will be  
22 blinded to the random group assignments. The chief researcher will have access to the final trial  
23 dataset. Baseline characteristics of the groups will be compared using chi-square and independent  
24 samples t-tests for the categorical variables. The Mann-Whitney U test will be used for assessing  
25 baseline continuous variables. Primary analysis for this study will be performed using intention to  
26 treat principles.

1

## 2 ***Generalized linear mixed model***

3 Each continuous outcome variable will be analyzed using a generalized linear mixed model  
4 (GLMM) fitted with a maximum likelihood estimation. We will assign the following fixed effects:  
5 group (experimental or control group), time (pre, post, or 3-month follow-up), and the interaction of  
6 group and time. In addition, we will include the participants as a random effect. All participants  
7 who provided baseline data are included in the analysis. LMM is an appropriate statistical method  
8 for longitudinal design studies with missing data in clinical trials [39]. All confidence intervals will  
9 be provided with 95% margins. For all tests, a two-sided significance level of  $p < 0.05$  will be used.  
10 Between-groups effect sizes will be calculated as standardized mean differences.

## 11 ***Minimal importance change***

12 MIC for each outcome will be calculated using the anchor-based method [40]. The area under the  
13 receiver operating characteristic curve will identify the cut-off point on CGI scores that most  
14 optimally distinguishes between CGI scores of minimal improvement (1–3) and scores of no  
15 difference (4–7). The cut-off will be used to provide an MIC estimate that will maximize the  
16 Youden J statistic: sensitivity – (1–specificity) [41]. On the other hand, since there are few  
17 possibilities of deteriorating in the recovery rehabilitation unit, there is a possibility of adopting a  
18 method that uses MIC as each outcome mean value of the client who evaluated CGI as 3 (slightly  
19 improved) [42].

## 21 ***Cost-effectiveness***

22 A cost-effectiveness analysis will be performed using the total cost and quality-adjusted life years  
23 (QALYs) based on the index value of EQ-5D. Incremental cost-effectiveness ratios (ICERs) will be  
24 calculated based on comparisons of the experimental and control groups. The total cost will be  
25 converted into US dollars using the average currency exchange rate at the time of data analysis.  
26 ICER will be estimated using the following equation:

$$ICER = [\mu C_e - \mu C_c] / [\mu E_e - \mu E_c]$$

where  $\mu C$  and  $\mu E$  represent the mean cost and mean QALY for the experimental and control groups, respectively. To account for uncertainty of ICER, the bootstrap method (1000 times) will be used for calculating mean values [43].

## Ethics and dissemination

This protocol has been approved by the ethics review committee of the Tokyo Metropolitan University (No.17020).

## Discussion

This research protocol proposal was prepared to examine the effect of ACS-OT on subjective QOL of clients in a recovery rehabilitation unit as an RCT. The process to be used in this study was devised based on the flow model and shares the perception of activities between the client and occupational therapist. Also, this process highlights the importance of provision of appropriate activities for clients. The client's perception of their challenge–skill balance is highly relevant to the degree of difficulty and occupational performance of activities provided by OT. We believe that understanding the client's subjective assessment of their activities according to their challenge–skill balance supports effective OT.

A previous RCT that used a similar protocol for older adults in an adult day program observed improvements in health-related QOL [24]. However, only one activity was examined and a follow-up period was not set. The current proposal will cover several activities such as toilet, bathing, cooking, shopping in which clients would require assistance during admission to a recovery rehabilitation unit. Furthermore, by setting a follow-up period, we will verify the continuity of the effect in addition to the direct effect of ACS-OT implementation. We hypothesize that ACS-OT will enhance the effects of positive emotions and self-affirmation by facilitating activities suitable for clients. As such, subjective QOL (according to the Ikigai-9) is the main

1 outcome. Importantly, this suggests that improvements in OT yield new findings on subjective QOL.  
2  
3 In addition, using a GLMM, it will be possible to perform an analysis that considers individual  
4  
5 differences as a random effect.  
6  
7  
8  
9

#### 10 **Study limitations**

11 Subjective evaluations, such as subjective QOL, health-related QOL, and flow experience, are  
12  
13 highly likely to result in measurement bias. To address this, we will adopt an RCT design and  
14  
15 perform self-assessed outcome measurements. In addition, there is a blinding problem in this RCT  
16  
17 as the investigators in this study are occupational therapists, and thus, it will be difficult to blind  
18  
19 occupational therapists to their assignment and intervention method.  
20  
21

22 We will use a convenience sample from the recovery rehabilitation unit of a single hospital, which  
23  
24 may not be representative of all clients in a recovery rehabilitation unit. This study will not include  
25  
26 patients with acute or subacute diseases, outpatients, and clients who use community rehabilitation  
27  
28 services. Therefore, our results cannot be generalized to these populations.  
29  
30  
31  
32  
33  
34  
35  
36  
37  
38  
39  
40  
41  
42  
43  
44  
45  
46  
47  
48  
49  
50  
51  
52  
53  
54  
55  
56  
57  
58  
59  
60

## Reference

1. Law, M. C. (Ed.). Client centered occupational therapy. Slack Incorporated. 1998.
2. Fearing, V. G., & Clark, J. (Eds.). Individuals in context: A practical guide to client-centered practice. Slack Incorporated. 2000.
3. Townsend, E., & A. Wilcock, A. Occupational justice and client-centred practice: A dialogue in progress. *Canadian journal of occupational therapy* 2004; **71**:75-87.
4. Sumsion, T., & Law, M. A review of evidence on the conceptual elements informing client-centred practice. *Canadian Journal of Occupational Therapy* 2006; **73**:153-162.
5. Whalley Hammell, K. R. Client-centred occupational therapy: the importance of critical perspectives. *Scandinavian journal of occupational therapy* 2015; **22**:237-243.
6. Atchley, R. C. A continuity theory of normal aging. *The gerontologist* 1989; **29**:183-190.
7. Atchley, R.C. Continuity and adaptation in aging: Creating positive experiences. Johns Hopkins University Press. 2000.
8. Maitra, K.K., Erway, F. Perception of client-centered practice in occupational therapists and their clients. *American Journal of Occupational Therapy* 2006; **60**:298-310.
9. Yoshida, I., Mima, H., Nonaka, T., Kobayashi, R., Hirao, K. Analysis of subjective evaluation in occupations of the elderly: A study based on the flow model (in Japanese). *The Journal of Japanese Occupational Therapy Association*. 2016; **35**:70-79.
10. Vallerand, R. J., & O'connor, B. P. Motivation in the elderly: A theoretical framework and some promising findings. *Canadian Psychology/Psychologie canadienne* 1989; **30**:538.
11. Krause, N. Stressors in salient social roles and well-being in later life. *Journal of Gerontology* 1994; **49**:137-148.
12. Csikszentmihalyi, M. Play and intrinsic rewards. *Journal of humanistic psychology*. 1975.
13. Csikszentmihalyi, M., Csikszentmihalyi, I.S, editors. Optimal experience: Psychological studies of flow in consciousness. Cambridge university press. 1992.

- 1 14. Haworth, J., Evans, S. Challenge, skill and positive subjective states in the daily life of a  
2 sample of YTS students. *Journal of Occupational and Organizational Psychology* 1995;  
3 **68**:109-121.
- 4 15. Nielsen, K., Cleal, B. Predicting flow at work: Investigating the activities and job  
5 characteristics that predict flow states at work. *Journal of Occupational Health Psychology*  
6 2010; **15**:180-190.
- 7 16. Larson, E., von Eye, A. Beyond flow: temporality and participation in everyday activities.  
8 *American Journal of Occupational Therapy* 2010; **64**:152-163.
- 9 17. Rebeiro, K, L., Polgar, J, M. Enabling occupational performance: optimal experiences in  
10 therapy. *Canadian Journal of Occupational Therapy* 1999; **66**:14-22.
- 11 18. Wright, J, J., Sadlo, G., Stew, G. Further explorations into the conundrum of flow process.  
12 *Journal of Occupational Science* 2007; **14**:136-144.
- 13 19. Hirao, K., Kobayashi, R., Okishima, K., Tomokuni, Y. Flow experience and health-related  
14 quality of life in community dwelling elderly Japanese. *Nursing & health sciences* 2012;  
15 **14**:52-57.
- 16 20. Yasunaga, M., Kobayashi, N., Yamada, T. The challenge skill ratio of users' experiences at an  
17 adult daycare center: Emotional states based on the Flow model (in Japanese). *The Journal of*  
18 *Japanese Occupational Therapy Association* 2012; **31**:83-93.
- 19 21. Massimini, F., Csikszentmihalyi, M., & Carli, M. The Monitoring of Optimal Experience. A  
20 Tool for Psychiatric Rehabilitation. *The Journal of Nervous and Mental Disease* 1987;  
21 **175**:545-549.
- 22 22. Moneta, G. B., & Csikszentmihalyi, M. The effect of perceived challenges and skills on the  
23 quality of subjective experience. *Journal of personality* 1996; **64**:275-310.
- 24 23. Novak, T. P., & Hoffman, D. L. Measuring the flow experience among web users. *Interval*  
25 *Research Corporation* 1997; **31**:1-36.



- 1 24. Yoshida, I., Hirao, K., Nonaka, T. Adjusting Challenge–Skill Balance to Improve Quality of  
2 Life in Older Adults: A Randomized Controlled Trial. *American Journal of Occupational*  
3 *Therapy* 2018; **72**:1-8.
- 4 25. Schiavi, M., Costi, S., Pellegrini, M., Formisano, D., Borghi, S., & Fugazzaro, S. Occupational  
5 therapy for complex inpatients with stroke: identification of occupational needs in post-acute  
6 rehabilitation setting. *Disability and rehabilitation* 2018; **40**:1026-1032.
- 7 26. Erdfelder, E., Faul, F., & Buchner, A. GPOWER: A general power analysis program. *Behavior*  
8 *research methods, instruments, & computers* 1996; **28**:1-11.
- 9 27. Chan, A. W., Tetzlaff, J. M., Altman, D. G., Laupacis, A., Gøtzsche, P. C., Krleža-Jerić, K., &  
10 Doré, C. J. SPIRIT 2013 statement: Defining standard protocol items for clinical trials.  
11 *Japanese Pharmacology and Therapeutics* 2017; **45**, 1895-1904.
- 12 28. EuroQol, G. EuroQol-a new facility for the measurement of health-related quality of life.  
13 *Health policy* 1990; **16**:199-208.
- 14 29. Anthony, J. C., LeResche, L., Niaz, U., Von Korff, M. R., & Folstein, M. F. Limits of the  
15 ‘Mini-Mental State’ as a screening test for dementia and delirium among hospital patients.  
16 *Psychological medicine* 1982; **12**:397-408.
- 17 30. American Occupational Therapy Association. Occupational therapy practice framework:  
18 Domain and process (3rd ed.). *American Journal of Occupational Therapy* 2014; **68**:S1-S48.
- 19 31. Law, M., Baptiste, S., McColl, M., Opzoomer, A., Polatajko, H., & Pollock, N. The Canadian  
20 occupational performance measure: an outcome measure for occupational therapy. *Canadian*  
21 *Journal of Occupational Therapy* 1990; **57**:82-87.
- 22 32. Csikszentmihalyi, M., Larson, R. Being adolescent: Conflict and growth in the teenage years.  
23 Basic Books. 1986.
- 24 33. Engeser, S., Rheinberg, F. Flow, moderators of challenge-skill-balance and performance.  
25 *Motivation and Emotion* 2008; **32**:158-172.

- 1 34. Imai, T., Osada, H., Nishimura, Y. The reliability and validity of a new scale for measuring the  
2 concept of Ikigai (Ikigai-9) (in Japanese). *Japanese Journal of Public Health* 2012;  
3  
4 59:433-439.
- 5 35. Yoshida, K., Asakawa, K., Yamauchi, T., Sakuraba, S., Sawamura, D., Murakami, Y., et al.  
6 The flow state scale for occupational tasks: development, reliability, and validity. *Hong Kong*  
7 *Journal of Occupational Therapy* 2013; **23**:54-61.
- 8 36. Granger, C. V., Hamilton, B. B., Keith, R. A., Zielezny, M., Sherwin, F. S. Advances in  
9 functional assessment for medical rehabilitation. *Topics in geriatric rehabilitation* 1986;  
10 1:59-74.
- 11 37. Guy, W. Clinical global impression scale. The ECDEU Assessment Manual for  
12 Psychopharmacology-Revised Volume DHEW Publ No ADM 1976; **76**:218-222.
- 13 38. Crosby, R. D., Kolotkin, R. L., & Williams, G. R. Defining clinically meaningful change in  
14 health-related quality of life. *Journal of clinical epidemiology* 2003; **56**:395-40.
- 15 39. Shek, D. T., Ma, C. M. Longitudinal data analyses using linear mixed models in SPSS:  
16 concepts, procedures and illustrations. *Scientific World Journal* 2011; **5**:42-76.
- 17 40. de Vet, H. C., Ostelo, R. W., Terwee, C. B., van der Roer, N., Knol, D. L., Beckerman, H., &  
18 Bouter, L. M. Minimally important change determined by a visual method integrating an  
19 anchor-based and a distribution-based approach. *Quality of life research* 2007; **16**:131.
- 20 41. Youden, W. J. Index for rating diagnostic tests. *Cancer* 1950; **3**:32-35.
- 21 42. van Kampen, D. A., Willems, W. J., van Beers, L. W., Castelein, R. M., Scholtes, V. A., &  
22 Terwee, C. B. Determination and comparison of the smallest detectable change (SDC) and the  
23 minimal important change (MIC) of four-shoulder patient-reported outcome measures  
24 (PROMs). *Journal of orthopaedic surgery and research* 2013; **8**, 40.
- 25 43. Briggs, A. H., Wonderling, D. E., & Mooney, C. Z. Pulling cost-effectiveness analysis up by its  
26 bootstraps: A non-parametric approach to confidence interval estimation. *Health economics*  
27 1997; **6**:327-340.

1  
2 1 **Footnotes**

3  
4 2

5  
6 3 Authors' contributions: IY conceived and designed the experiments. IY performed the experiments.  
7  
8 4 IY and KH analyzed data. IY drafted the paper. KH and RK made further reviews as well as  
9  
10 5 modifications. RK is also responsible for managing voluntarily reported adverse events from clients  
11  
12 6 and other unintended effects of the intervention. All authors have read and approved the final  
13  
14 7 manuscript.

15  
16 8

17  
18 9 Acknowledgements: We appreciate the clients who participated in our research. In addition, we  
19  
20 appreciate the clients and public consultants who advised on research subjects, research designs,  
21  
22 and outcome measures.  
23  
24 11

25  
26 12

27  
28 13 Funding statement: This work was supported by Japanese Association of Occupational Therapists  
29  
30 Grant, number 2017-04.

31  
32 15

33  
34 16 Competing interests statement: None declared.  
35  
36  
37  
38  
39  
40  
41  
42  
43  
44  
45  
46  
47  
48  
49  
50  
51  
52  
53  
54  
55  
56  
57  
58  
59  
60

Figure 1. SPIRIT diagram describing schedule of enrolment, interventions and assessments.

| TIMEPOINT                              | Study Period |          |            |                 |           |           |
|----------------------------------------|--------------|----------|------------|-----------------|-----------|-----------|
|                                        | Enrolment    | Baseline | Allocation | Post-allocation |           | Close-out |
|                                        | 0            | 0        | 0          | Intervention    | Discharge | 3months   |
| <b>ENROLMENT:</b>                      |              |          |            |                 |           |           |
| Eligibility screen                     | X            |          |            |                 |           |           |
| Informed consent                       | X            |          |            |                 |           |           |
| Allocation                             |              |          | X          |                 |           |           |
| <b>INTERVENTIONS:</b>                  |              |          |            |                 |           |           |
| Experimental Group                     |              |          |            | ←→              |           |           |
| Control Group                          |              |          |            | ←→              |           |           |
| <b>ASSESSMENTS:</b>                    |              |          |            |                 |           |           |
| Baseline variables                     | X            |          |            |                 |           |           |
| Ikigai-9                               |              | X        |            |                 | X         | X         |
| EQ-5D                                  |              | X        |            |                 | X         | X         |
| Flow state scale for occupational task |              | X        |            |                 | X         |           |
| FIM                                    |              | X        |            |                 | X         |           |
| CGI                                    |              |          |            |                 | X         |           |
| ACS implementation status              |              |          |            |                 | X*        |           |

\* ACS implementation status covered the experimental group

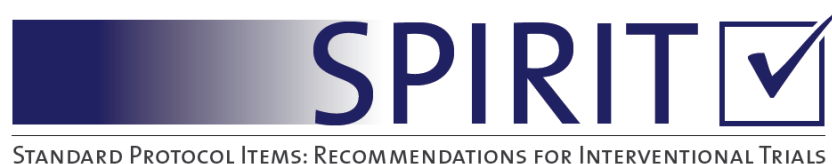

STANDARD PROTOCOL ITEMS: RECOMMENDATIONS FOR INTERVENTIONAL TRIALS

SPIRIT 2013 Checklist: Recommended items to address in a clinical trial protocol and related documents\*

| Section/item                      | Item No | Description                                                                                                                                                                                                                                                                              | Addressed on page number                         |
|-----------------------------------|---------|------------------------------------------------------------------------------------------------------------------------------------------------------------------------------------------------------------------------------------------------------------------------------------------|--------------------------------------------------|
| <b>Administrative information</b> |         |                                                                                                                                                                                                                                                                                          |                                                  |
| Title                             | 1       | Descriptive title identifying the study design, population, interventions, and, if applicable, trial acronym                                                                                                                                                                             | p1 l-2                                           |
| Trial registration                | 2a      | Trial identifier and registry name. If not yet registered, name of intended registry                                                                                                                                                                                                     | p2 l11-12                                        |
|                                   | 2b      | All items from the World Health Organization Trial Registration Data Set                                                                                                                                                                                                                 | Contained in various parts throughout manuscript |
| Protocol version                  | 3       | Date and version identifier                                                                                                                                                                                                                                                              | p2 l11-12                                        |
| Funding                           | 4       | Sources and types of financial, material, and other support                                                                                                                                                                                                                              | p19 l13-14                                       |
| Roles and responsibilities        | 5a      | Names, affiliations, and roles of protocol contributors                                                                                                                                                                                                                                  | p1 l4-12, p19 l3-7                               |
|                                   | 5b      | Name and contact information for the trial sponsor                                                                                                                                                                                                                                       | p1 l4-12                                         |
|                                   | 5c      | Role of study sponsor and funders, if any, in study design; collection, management, analysis, and interpretation of data; writing of the report; and the decision to submit the report for publication, including whether they will have ultimate authority over any of these activities | p19 l13-14                                       |

1 5d Composition, roles, and responsibilities of the coordinating centre, steering committee, endpoint  
 2 adjudication committee, data management team, and other individuals or groups overseeing the trial, if  
 3 applicable (see Item 21a for data monitoring committee)  
 4  
 5  
 6  
 7  
 8  
 9

n/a

## 10 Introduction

11 Background and 6a Description of research question and justification for undertaking the trial, including summary of relevant  
 12 rationale studies (published and unpublished) examining benefits and harms for each intervention p4 l1-p5 l17  
 13  
 14 6b Explanation for choice of comparators p5 l20  
 15  
 16 Objectives 7 Specific objectives or hypotheses p5 l13-17  
 17  
 18 Trial design 8 Description of trial design including type of trial (eg, parallel group, crossover, factorial, single group),  
 19 allocation ratio, and framework (eg, superiority, equivalence, noninferiority, exploratory) p6 l18-19  
 20  
 21  
 22

## 23 Methods: Participants, interventions, and outcomes

24 Study setting 9 Description of study settings (eg, community clinic, academic hospital) and list of countries where data will  
 25 be collected. Reference to where list of study sites can be obtained p7 l11-12  
 26  
 27 Eligibility criteria 10 Inclusion and exclusion criteria for participants. If applicable, eligibility criteria for study centres and  
 28 individuals who will perform the interventions (eg, surgeons, psychotherapists) p7 l10-16  
 29  
 30 Interventions 11a Interventions for each group with sufficient detail to allow replication, including how and when they will be  
 31 administered p7 l25-p9 l26  
 32  
 33 11b Criteria for discontinuing or modifying allocated interventions for a given trial participant (eg, drug dose  
 34 change in response to harms, participant request, or improving/worsening disease) p7 l15-16  
 35  
 36 11c Strategies to improve adherence to intervention protocols, and any procedures for monitoring adherence  
 37 (eg, drug tablet return, laboratory tests) p8 l10-11  
 38  
 39 11d Relevant concomitant care and interventions that are permitted or prohibited during the trial p9 l1-3  
 40  
 41  
 42

|    |                      |    |                                                                                                                                                                                                                                                                                                                                                                                |                |
|----|----------------------|----|--------------------------------------------------------------------------------------------------------------------------------------------------------------------------------------------------------------------------------------------------------------------------------------------------------------------------------------------------------------------------------|----------------|
| 1  | Outcomes             | 12 | Primary, secondary, and other outcomes, including the specific measurement variable (eg, systolic blood pressure), analysis metric (eg, change from baseline, final value, time to event), method of aggregation (eg, median, proportion), and time point for each outcome. Explanation of the clinical relevance of chosen efficacy and harm outcomes is strongly recommended | p10 l2-p11 l16 |
| 6  | Participant timeline | 13 | Time schedule of enrolment, interventions (including any run-ins and washouts), assessments, and visits for participants. A schematic diagram is highly recommended (see Figure)                                                                                                                                                                                               | Figure 1       |
| 10 | Sample size          | 14 | Estimated number of participants needed to achieve study objectives and how it was determined, including clinical and statistical assumptions supporting any sample size calculations                                                                                                                                                                                          | p6 l9-15       |
| 13 | Recruitment          | 15 | Strategies for achieving adequate participant enrolment to reach target sample size                                                                                                                                                                                                                                                                                            | p6 l14-15      |

**Methods: Assignment of interventions (for controlled trials)**

Allocation:

|    |                                  |     |                                                                                                                                                                                                                                                                                                                                                          |              |
|----|----------------------------------|-----|----------------------------------------------------------------------------------------------------------------------------------------------------------------------------------------------------------------------------------------------------------------------------------------------------------------------------------------------------------|--------------|
| 19 | Sequence generation              | 16a | Method of generating the allocation sequence (eg, computer-generated random numbers), and list of any factors for stratification. To reduce predictability of a random sequence, details of any planned restriction (eg, blocking) should be provided in a separate document that is unavailable to those who enrol participants or assign interventions | p6 l19-p7 l6 |
| 25 | Allocation concealment mechanism | 16b | Mechanism of implementing the allocation sequence (eg, central telephone; sequentially numbered, opaque, sealed envelopes), describing any steps to conceal the sequence until interventions are assigned                                                                                                                                                | p7 l2-5      |
| 30 | Implementation                   | 16c | Who will generate the allocation sequence, who will enrol participants, and who will assign participants to interventions                                                                                                                                                                                                                                | p7 l2-6      |
| 33 | Blinding (masking)               | 17a | Who will be blinded after assignment to interventions (eg, trial participants, care providers, outcome assessors, data analysts), and how                                                                                                                                                                                                                | p7 l6-8      |
| 36 |                                  | 17b | If blinded, circumstances under which unblinding is permissible, and procedure for revealing a participant's allocated intervention during the trial                                                                                                                                                                                                     | p7 l6-8      |

## Methods: Data collection, management, and analysis

|    |                            |     |                                                                                                               |                     |
|----|----------------------------|-----|---------------------------------------------------------------------------------------------------------------|---------------------|
| 1  |                            |     |                                                                                                               |                     |
| 2  |                            |     |                                                                                                               |                     |
| 3  |                            |     |                                                                                                               |                     |
| 4  | Data collection            | 18a | Plans for assessment and collection of outcome, baseline, and other trial data, including any related         | p10 I3-4            |
| 5  | methods                    |     | processes to promote data quality (eg, duplicate measurements, training of assessors) and a description of    |                     |
| 6  |                            |     | study instruments (eg, questionnaires, laboratory tests) along with their reliability and validity, if known. |                     |
| 7  |                            |     | Reference to where data collection forms can be found, if not in the protocol                                 |                     |
| 8  |                            |     |                                                                                                               |                     |
| 9  |                            | 18b | Plans to promote participant retention and complete follow-up, including list of any outcome data to be       | p7 I20-21, p12 I6-8 |
| 10 |                            |     | collected for participants who discontinue or deviate from intervention protocols                             |                     |
| 11 |                            |     |                                                                                                               |                     |
| 12 | Data management            | 19  | Plans for data entry, coding, security, and storage, including any related processes to promote data quality  | p11 I20-21          |
| 13 |                            |     | (eg, double data entry; range checks for data values). Reference to where details of data management          |                     |
| 14 |                            |     | procedures can be found, if not in the protocol                                                               |                     |
| 15 |                            |     |                                                                                                               |                     |
| 16 |                            |     |                                                                                                               |                     |
| 17 | Statistical methods        | 20a | Statistical methods for analysing primary and secondary outcomes. Reference to where other details of the     | p12 I2-10           |
| 18 |                            |     | statistical analysis plan can be found, if not in the protocol                                                |                     |
| 19 |                            |     |                                                                                                               |                     |
| 20 |                            | 20b | Methods for any additional analyses (eg, subgroup and adjusted analyses)                                      | p12 I11-p13 I4      |
| 21 |                            |     |                                                                                                               |                     |
| 22 |                            | 20c | Definition of analysis population relating to protocol non-adherence (eg, as randomised analysis), and any    |                     |
| 23 |                            |     | statistical methods to handle missing data (eg, multiple imputation)                                          | p12 I6-8            |
| 24 |                            |     |                                                                                                               |                     |
| 25 |                            |     |                                                                                                               |                     |
| 26 | <b>Methods: Monitoring</b> |     |                                                                                                               |                     |
| 27 |                            |     |                                                                                                               |                     |
| 28 | Data monitoring            | 21a | Composition of data monitoring committee (DMC); summary of its role and reporting structure; statement of     | n/a                 |
| 29 |                            |     | whether it is independent from the sponsor and competing interests; and reference to where further details    | Low risk            |
| 30 |                            |     | about its charter can be found, if not in the protocol. Alternatively, an explanation of why a DMC is not     | intervention        |
| 31 |                            |     | needed                                                                                                        |                     |
| 32 |                            |     |                                                                                                               |                     |
| 33 |                            |     |                                                                                                               |                     |
| 34 |                            | 21b | Description of any interim analyses and stopping guidelines, including who will have access to these interim  | n/a                 |
| 35 |                            |     | results and make the final decision to terminate the trial                                                    | Low risk            |
| 36 |                            |     |                                                                                                               | intervention        |
| 37 |                            |     |                                                                                                               |                     |
| 38 | Harms                      | 22  | Plans for collecting, assessing, reporting, and managing solicited and spontaneously reported adverse         | p19 I5-6            |
| 39 |                            |     | events and other unintended effects of trial interventions or trial conduct                                   |                     |
| 40 |                            |     |                                                                                                               |                     |
| 41 |                            |     |                                                                                                               |                     |
| 42 |                            |     |                                                                                                               |                     |
| 43 |                            |     |                                                                                                               |                     |
| 44 |                            |     |                                                                                                               |                     |
| 45 |                            |     |                                                                                                               |                     |
| 46 |                            |     |                                                                                                               |                     |



|    |                                 |     |                                                                                                                                                                                                                                                                                     |                                 |
|----|---------------------------------|-----|-------------------------------------------------------------------------------------------------------------------------------------------------------------------------------------------------------------------------------------------------------------------------------------|---------------------------------|
| 1  | Auditing                        | 23  | Frequency and procedures for auditing trial conduct, if any, and whether the process will be independent from investigators and the sponsor                                                                                                                                         | n/a<br>Low risk<br>intervention |
| 2  |                                 |     |                                                                                                                                                                                                                                                                                     |                                 |
| 3  |                                 |     |                                                                                                                                                                                                                                                                                     |                                 |
| 4  |                                 |     |                                                                                                                                                                                                                                                                                     |                                 |
| 5  |                                 |     |                                                                                                                                                                                                                                                                                     |                                 |
| 6  | <b>Ethics and dissemination</b> |     |                                                                                                                                                                                                                                                                                     |                                 |
| 7  |                                 |     |                                                                                                                                                                                                                                                                                     |                                 |
| 8  | Research ethics approval        | 24  | Plans for seeking research ethics committee/institutional review board (REC/IRB) approval                                                                                                                                                                                           | p13 l6-8                        |
| 9  |                                 |     |                                                                                                                                                                                                                                                                                     |                                 |
| 10 |                                 |     |                                                                                                                                                                                                                                                                                     |                                 |
| 11 | Protocol amendments             | 25  | Plans for communicating important protocol modifications (eg, changes to eligibility criteria, outcomes, analyses) to relevant parties (eg, investigators, REC/IRBs, trial participants, trial registries, journals, regulators)                                                    | No changes anticipated          |
| 12 |                                 |     |                                                                                                                                                                                                                                                                                     |                                 |
| 13 |                                 |     |                                                                                                                                                                                                                                                                                     |                                 |
| 14 |                                 |     |                                                                                                                                                                                                                                                                                     |                                 |
| 15 | Consent or assent               | 26a | Who will obtain informed consent or assent from potential trial participants or authorised surrogates, and how (see Item 32)                                                                                                                                                        | p7 l19-23                       |
| 16 |                                 |     |                                                                                                                                                                                                                                                                                     |                                 |
| 17 |                                 |     |                                                                                                                                                                                                                                                                                     |                                 |
| 18 |                                 | 26b | Additional consent provisions for collection and use of participant data and biological specimens in ancillary studies, if applicable                                                                                                                                               | n/a                             |
| 19 |                                 |     |                                                                                                                                                                                                                                                                                     |                                 |
| 20 |                                 |     |                                                                                                                                                                                                                                                                                     |                                 |
| 21 |                                 |     |                                                                                                                                                                                                                                                                                     |                                 |
| 22 | Confidentiality                 | 27  | How personal information about potential and enrolled participants will be collected, shared, and maintained in order to protect confidentiality before, during, and after the trial                                                                                                | p11 l19-23                      |
| 23 |                                 |     |                                                                                                                                                                                                                                                                                     |                                 |
| 24 |                                 |     |                                                                                                                                                                                                                                                                                     |                                 |
| 25 | Declaration of interests        | 28  | Financial and other competing interests for principal investigators for the overall trial and each study site                                                                                                                                                                       | p19 l16                         |
| 26 |                                 |     |                                                                                                                                                                                                                                                                                     |                                 |
| 27 |                                 |     |                                                                                                                                                                                                                                                                                     |                                 |
| 28 | Access to data                  | 29  | Statement of who will have access to the final trial dataset, and disclosure of contractual agreements that limit such access for investigators                                                                                                                                     | p11 l22-23                      |
| 29 |                                 |     |                                                                                                                                                                                                                                                                                     |                                 |
| 30 |                                 |     |                                                                                                                                                                                                                                                                                     |                                 |
| 31 | Ancillary and post-trial care   | 30  | Provisions, if any, for ancillary and post-trial care, and for compensation to those who suffer harm from trial participation                                                                                                                                                       | n/a                             |
| 32 |                                 |     |                                                                                                                                                                                                                                                                                     |                                 |
| 33 |                                 |     |                                                                                                                                                                                                                                                                                     |                                 |
| 34 | Dissemination policy            | 31a | Plans for investigators and sponsor to communicate trial results to participants, healthcare professionals, the public, and other relevant groups (eg, via publication, reporting in results databases, or other data sharing arrangements), including any publication restrictions | p7 l22-23                       |
| 35 |                                 |     |                                                                                                                                                                                                                                                                                     |                                 |
| 36 |                                 |     |                                                                                                                                                                                                                                                                                     |                                 |
| 37 |                                 |     |                                                                                                                                                                                                                                                                                     |                                 |
| 38 |                                 |     |                                                                                                                                                                                                                                                                                     |                                 |
| 39 |                                 | 31b | Authorship eligibility guidelines and any intended use of professional writers                                                                                                                                                                                                      | n/a                             |
| 40 |                                 |     |                                                                                                                                                                                                                                                                                     |                                 |
| 41 |                                 | 31c | Plans, if any, for granting public access to the full protocol, participant-level dataset, and statistical code                                                                                                                                                                     | n/a                             |
| 42 |                                 |     |                                                                                                                                                                                                                                                                                     |                                 |

**Appendices**

|                            |    |                                                                                                                                                                                                |                                         |
|----------------------------|----|------------------------------------------------------------------------------------------------------------------------------------------------------------------------------------------------|-----------------------------------------|
| Informed consent materials | 32 | Model consent form and other related documentation given to participants and authorised surrogates                                                                                             | Will be available in Japanese if wanted |
| Biological specimens       | 33 | Plans for collection, laboratory evaluation, and storage of biological specimens for genetic or molecular analysis in the current trial and for future use in ancillary studies, if applicable | n/a                                     |

\*It is strongly recommended that this checklist be read in conjunction with the SPIRIT 2013 Explanation & Elaboration for important clarification on the items. Amendments to the protocol should be tracked and dated. The SPIRIT checklist is copyrighted by the SPIRIT Group under the Creative Commons "[Attribution-NonCommercial-NoDerivs 3.0 Unported](#)" license.

# BMJ Open

## Effect of adjusting the challenge–skill balance for occupational therapy: study protocol for a randomized controlled trial

|                                 |                                                                                                                                                                                                                                                                                                                                                                                             |
|---------------------------------|---------------------------------------------------------------------------------------------------------------------------------------------------------------------------------------------------------------------------------------------------------------------------------------------------------------------------------------------------------------------------------------------|
| Journal:                        | <i>BMJ Open</i>                                                                                                                                                                                                                                                                                                                                                                             |
| Manuscript ID                   | bmjopen-2018-022438.R2                                                                                                                                                                                                                                                                                                                                                                      |
| Article Type:                   | Protocol                                                                                                                                                                                                                                                                                                                                                                                    |
| Date Submitted by the Author:   | 06-Nov-2018                                                                                                                                                                                                                                                                                                                                                                                 |
| Complete List of Authors:       | Yoshida, Ippei; Tokyo Metropolitan University Graduate School of Human Health Sciences, Department of Occupational Therapy; Harue hospital, Department of Rehabilitation<br>Hirao, Kazuki; Kibi International University Graduate School of Health Sciences<br>Kobayashi, Ryuji; Tokyo Metropolitan University Graduate School of Human Health Sciences, Department of Occupational Therapy |
| <b>Primary Subject Heading</b>: | Rehabilitation medicine                                                                                                                                                                                                                                                                                                                                                                     |
| Secondary Subject Heading:      | Evidence based practice, Health services research, Patient-centred medicine                                                                                                                                                                                                                                                                                                                 |
| Keywords:                       | REHABILITATION MEDICINE, Occupational therapy, Flow model, Randomized control trial                                                                                                                                                                                                                                                                                                         |
|                                 |                                                                                                                                                                                                                                                                                                                                                                                             |

SCHOLARONE™  
Manuscripts

1  
2 1 **Effect of adjusting the challenge–skill balance for occupational therapy: study protocol for a**  
3  
4 2 **randomized controlled trial**  
5

6  
7 3  
8  
9 4 A. Ippei Yoshida, Kazuki Hirao, Ryuji Kobayashi

10  
11 5 B. Ippei Yoshida, Tokyo Metropolitan University Graduate School of Human Health Sciences,  
12  
13 6 Department of Occupational Therapy; Harue hospital, Department of Rehabilitation.

14  
15 7 7-2-10, Higashiogu, Arakawa-ku, Tokyo, Japan 116-8551.

16  
17 8 e-mail; ippe.i.yoshi@gmail.com, TEL; +81-3-3819-1211. FAX; +81-3-3892-2248.

18  
19  
20 9 C. Kazuki Hirao, Kibi International University Graduate School of Health Sciences, Okayama, Japan.

21  
22 10 Ryuji Kobayashi, Tokyo Metropolitan University Graduate School of Human Health Sciences,  
23  
24 11 Department of Occupational Therapy, Tokyo, Japan.

25  
26  
27 12 D. REHABILITATION MEDICINE, Occupational therapy, Flow model, Randomized control trial

28  
29 13 E. Word count: 3821  
30

31  
32 14  
33  
34 15 Correspondence to

35  
36 16 Ippei Yoshida; ippe.i.yoshi@gmail.com  
37  
38  
39 17

40  
41 18 **Abstract**

42  
43 19 **Introduction:** Occupational therapy (OT) is defined as the promotion of client health and well-being  
44  
45 20 through a client-centered practice. However, there is a tendency to rely on the therapist's experiences  
46  
47 21 and values, and there is a difference between the client's and therapist's perceptions regarding the  
48  
49 22 current activity that the client is engaged in. In previous studies that have applied "flow," activities  
50  
51 23 supported by OT in elderly people were analyzed, indicating a difference in recognition. Therefore,  
52  
53 24 we thought that more effective OT could be implemented by adjusting the challenge–skill balance,  
54  
55 25 and we invented a novel process termed as adjusting the challenge–skill balance for OT (ACS-OT).  
56  
57 26 The purpose of this study is to verify the effect of ACS-OT on clients in the recovery rehabilitation  
58  
59  
60

1  
2 1 unit and to prepare a protocol for randomized control trial (RCT) implementation.  
3

4 2 **Method and Analysis:** This single-blind RCT will recruit 80 50–99-year-old clients admitted to the  
5  
6 3 recovery rehabilitation unit who meet eligibility criteria. Clients will be randomly allocated to receive  
7  
8 4 ACS-OT or standard OT. Both interventions will be performed during the clients' residence at the  
9  
10 5 unit. The primary outcome measure will be subjective quality of life and will be measured at entry  
11  
12 6 into (pre) and at discharge from (post) the unit and at 3 months afterwards (follow-up). Outcomes  
13  
14 7 will be analyzed using a generalized linear mixed model fitted with a maximum likelihood estimation.  
15  
16 8

17  
18 8 **Ethics and Dissemination:** This protocol has been approved by the ethics review committee of the  
19  
20 9 Tokyo Metropolitan University (No.17020). Results of this trial will be submitted for publication in  
21  
22 10 a peer-reviewed journal.  
23  
24

25 11 **Registration:** University Hospital Medical Information Network 2017 UMIN000029505. Registered  
26  
27 12 on October 11, 2017.  
28  
29  
30  
31  
32  
33  
34  
35  
36  
37  
38  
39  
40  
41  
42  
43  
44  
45  
46  
47  
48  
49  
50  
51  
52  
53  
54  
55  
56  
57  
58  
59  
60

1  
2 **1 Strengths and limitations of this study**  
3

- 4 2 • We designed a RCT to verify if ACS-OT is effective in improving subjective quality of life.  
5  
6 3 • Stratified randomization is responsible for homogeneous assignment of experimental group and  
7  
8 control group.  
9  
10 4  
11 5 • Outcomes analysis using clients as random effect by linear mixed model.  
12  
13 6 • It is impossible to blind the therapists because of the nature of intervention in the OT process.  
14  
15  
16 7 • Our study results will be limited to the recovery rehabilitation unit.  
17  
18  
19  
20  
21  
22  
23  
24  
25  
26  
27  
28  
29  
30  
31  
32  
33  
34  
35  
36  
37  
38  
39  
40  
41  
42  
43  
44  
45  
46  
47  
48  
49  
50  
51  
52  
53  
54  
55  
56  
57  
58  
59  
60

## 1      1      **Background**

2      2      Rehabilitation aims to maximally promote the process of recovery from injury, illness, or disease,  
3  
4      3      supporting the client to reach a normal condition. An occupational therapist is a health professional  
5  
6      4      who aims to support the client to return to independence, meaning, satisfaction in all aspects of  
7  
8      5      people's lives. Likewise, occupational therapy (OT) is defined as a profession that promotes clients'  
9  
10      6      health and well-being through a client-centered practice. In many countries, client-centered practice  
11  
12      7      is the basis for OT; this practice contributes to the realization of meaningful activities for the client  
13  
14      8      [1-5], which are defined as familiar activities which aligns with an individual's pursuit of valued  
15  
16      9      developmental goals to maintain a personally meaningful lifestyle [6-7]. In saying this, within  
17  
18      10      processes related to a client-centered practice, there is a tendency to rely on the therapist's experience  
19  
20      11      and values. There is a difference between the client's and therapist's perceptions regarding the  
21  
22      12      activity engaged in by the client [8-9]. To support the activity *desired* by the client, it is necessary to  
23  
24      13      determine the client's evaluation of the activity in a form that the client and the therapist can easily  
25  
26      14      share. In addition, deterioration of the client's health and physical and mental functions, and loss of  
27  
28      15      social role often causes decreased motivation to perform these activities [10-11]. Therefore, in OT, it  
29  
30      16      is necessary for clients and therapists to easily share the meaning of activity and to provide support  
31  
32      17      that facilitates positive client mental state. To reflect this in our research, we applied the concept of  
33  
34      18      "flow," which captures the psychological state of a particular activity. Flow is defined as "the state  
35  
36      19      in which people are so involved in an activity that nothing else seems to matter at the time; the  
37  
38      20      experience is so enjoyable that people will do it even at great cost, for the sheer sake of doing it" [12].  
39  
40      21      With regards to research on flow in the OT field, there have been reports on improved happiness,  
41  
42      22      self-esteem, work productivity, and subjective well-being level [13-18]. According to  
43  
44      23      Csikszentmihalyi [12], flow can be explained according to the balance between challenge and skills,  
45  
46      24      i.e., the "flow model." Flow is experienced when an individual's perception of the difficulty  
47  
48      25      associated with an activity is balanced with their level of skill. Conversely, activities in which the  
49  
50      26      individual's skill is perceived to be too close to the difficulty associated with the activity leads to

1 boredom. Similarly, conditions of low-perceived skill in a high-perceived challenge result anxiety,  
2 whereas conditions of low-perceived skill and low-perceived challenge result in apathy. Several  
3 cross-sectional studies using the flow model have been reported [19-23]. In our previous research  
4 using the flow model to shape the OT practice, although the occupational therapist judged the activity  
5 to be suitable for the clients, clients themselves felt that the activity made them feel anxious, bored,  
6 and apathetic [9].

7 We believe that more effective OT and realization of meaningful activities for clients could be  
8 provided by adjusting the challenge–skill balance. Therefore, we invented a new process called  
9 adjusting the challenge–skill balance for OT (ACS-OT). A randomized controlled trial (RCT)  
10 conducted using ACS-OT for the elderly in an adult day program showed improvements in health-  
11 related quality of life (QOL) [24]. However, this previous research only tested one activity, which  
12 limits the generalization of the effect of ACS-OT on the larger population and to different activities.  
13 Therefore, we propose to examine the effect of ACS-OT on clients in the recovery phase who need  
14 timely support on activities of daily living (ADL) and occupational performance necessary to return  
15 to their home life. To test this, we plan to employ ACS-OT in the recovery rehabilitation unit of Harue  
16 Hospital, Fukui, Japan, and to determine a protocol for RCT implementation.

## 18 **Method and Analysis**

19 This study was designed as a single-blind RCT, this protocol will be reported according to the  
20 Standard Protocol Items: Recommendations for Interventional Trials (SPIRIT) statement [25] and the  
21 results of this trial will be reported according to the Consolidated Standards of Reporting Trials  
22 (CONSORT) guidelines [26]. This study is planned to compare ACS-OT with standard occupational  
23 therapy (control). To minimize heterogeneity of the client sample, we will test clients aged 50–99  
24 years old admitted to the recovery rehabilitation unit. This age range was chosen as the average age  
25 of patients admitted is  $76.8 \pm 12.7$  years, and we extended the target age range to  $\pm 2$  standard  
26 deviations. As discussed in a previous review [27], this study represents the practice of client-centered



1  
2 1 OT, focusing on ADL and occupational performance. To determine if ACS-OT could be effective  
3  
4 2 with various diseases, we targeted cerebrovascular and musculoskeletal disease, which are the main  
5  
6 3 diseases observed at our recovery rehabilitation unit. The average admission period in this unit is 8–  
7  
8 4 10 weeks for cerebrovascular disease and 6–8 weeks for musculoskeletal disease. The intervention  
9  
10 5 period in this study is set to 6–10 weeks, and the number of interventions would be 36–60. The  
11  
12 6 primary outcome measure will be change in subjective QOL, which will be compared between the  
13  
14 7 experimental and control groups. The secondary outcome measure will be change in flow experience,  
15  
16 8 health-related QOL, and performance of ADL. A SPIRIT diagram detailing the timing of enrolment,  
17  
18 9 interventions and assessments is provided in figure 1.  
19  
20  
21  
22  
23  
24

### 25 11 **Feasibility of recruitment and sample size**

26  
27 12 We conducted an a priori power analysis (using G\*power, version 3.1.7) [28] that assumed a medium-  
28  
29 13 to-large effect size based on the results of a previous RCT in the field of OT with an effect size of  
30  
31 14 0.76 [24]. The analysis indicated that a total sample size of 68 clients (34 in each group) would  
32  
33 15 provide 80% power for detecting a difference, with an effect size of 0.7 for health-related QOL scores  
34  
35 16 using a two-tailed test and an alpha level of 0.05. To compensate for client drop out, we will recruit  
36  
37 17 80 clients. We aim to finish this recruitment in 1 year.  
38  
39  
40  
41  
42

### 43 19 **Randomization**

44  
45 20 Clients will be randomly assigned by blocked randomization (block size four) to the experimental or  
46  
47 21 control groups. As the factors within the experimental and control groups affecting the outcome  
48  
49 22 measures are homogeneous, randomization will be stratified by the disease group  
50  
51 23 (cerebrovascular/musculoskeletal disease) and a visual analog scale for self-assessment of general  
52  
53 24 health in EuroQol-5 Dimensions (EQ-5D) [EQ-VAS (high/low, boundary 50)] [29] will be used,  
54  
55 25 resulting in four layers: 1. cerebrovascular disease and high EQ-VAS, 2. cerebrovascular disease and  
56  
57 26 low EQ-VAS, 3. musculoskeletal disease and high EQ-VAS, and 4. musculoskeletal disease and low  
58  
59  
60

1  
2 1 EQ-VAS. Block order will be randomly assigned using computer-generated software (R. Ver. 3.2.1).  
3  
4 2 Our statistician will create a block random pattern of each layer, but the grouping will be single-  
5  
6 3 blinded. On the basis of the calculated random pattern, the assignment will be known to the  
7  
8 4 occupational therapist. We intend to individually randomize patients in this research, and we use a  
9  
10 5 dedicated process support application in the experimental group, but not in the control group.  
11  
12 6 Therefore, there is almost no possibility of contamination between the two groups. The clients will  
13  
14 7 be blinded to group allocation, although the therapists will be aware of the treatment group assigned.  
15  
16 8 After the last outcome measurement point, each client will be asked to guess their assigned group.  
17  
18 9

## 10 **Inclusion and exclusion criteria**

11 Inclusion criteria for this study will be clients with cerebrovascular or musculoskeletal disease  
12 admitted to the recovery rehabilitation unit of the Harue Hospital, Fukui, Japan. Clients aged <50  
13 years and >100 years at the time of their admission to the unit will be excluded from the study. In  
14 addition, clients whose Mini-Mental State Examination score is assessed as  $\leq 23$  points at their first  
15 OT appointment after admission to the unit will be excluded from the study [30]. The exclusion  
16 criteria are transfer of the patient to another unit, another hospital, or death.

## 18 **Patient and Public Involvement statement**

19 The clients will be not involved in the recruitment to and conduct of this study. We have designed  
20 the study to minimize client time and physical restrictions; all participants are free to withdraw from  
21 the study at any time. Structural evaluation on client's burden in RCTs will be not performed. We will  
22 inform the results to the applicants.

23

## 24 **Procedure**

## 25 **Intervention**

58  
59  
60

1  
2 1 In the experimental and control groups, OT will be provided in accordance with the American  
3  
4 2 Occupational Therapy Association guidelines [31]. The study intervention will be implemented by  
5  
6 3 occupational therapists who have at least 200 work h of experience in delivering treatment according  
7  
8 4 to client-centered OT. Moreover, therapists will be trained for at least 50 h on ACS-OT. The standard  
9  
10 5 OT program will focus on the occupational performance of activities and be conducted individually  
11  
12 6 with each client. Treatment will consist of 40–60-min sessions, conducted six times per week. The  
13  
14 7 implementation period will be from admission to discharge.  
15  
16  
17  
18  
19

## 20 9 **Experimental group**

21  
22 10 In the experimental group, we used our own custom application program designed to run on a  
23  
24 11 mobile device to control the following processes.  
25  
26

- 27 12 1. During the first session of OT, the therapist will assess the client's problems with ADL using  
28  
29 13 the Canadian Occupational Performance Measure [32]. Based on the problems identified,  
30  
31 14 activities that could be supported by OT will be identified.  
32  
33
- 34 15 2. During the second session, the client will perform the selected activities and will be invited to  
35  
36 16 evaluate the activities using the challenge and skill levels assessment. The “challenge level” will  
37  
38 17 be defined as the client's perception of the level of difficulty associated with the activity and  
39  
40 18 will be rated on a seven-point scale from “very simple” (1) to “very difficult” (7). The “skill  
41  
42 19 level” will be defined as the client's perception of their own skills in relation to the activity and  
43  
44 20 will be rated on a seven-point scale from “not at all” (1) to “very skillful” (7) [33-34]. At that  
45  
46 21 time, the therapist will clarify with the client regarding reasons for their challenge and skill level  
47  
48 22 ratings.  
49  
50
- 51  
52 23 3. Based on the client's and therapist's evaluations, the factors which make the client's  
53  
54 24 occupational performance more difficult (challenge components, such as environment,  
55  
56 25 execution time, and movement range required for activity) and factors that improve their  
57  
58 26 occupational performance (skill components, such as frequency, range, distance, accuracy, and  
59  
60

1  
2 1 dexterity) will be determined. In the experimental group, the compensation approach, such as  
3  
4 2 environmental adjustment and use of technical aid, will be used for adjusting the challenge  
5  
6 3 level.  
7

8  
9 4 4. Based on these components and traditional assessment and activity analysis, the occupational  
10  
11 5 therapist will reconfigure the activity contents after adjusting the challenge–skill balance. The  
12  
13 6 criteria for judging that the challenge–skill balance has been adjusted is defined in terms of the  
14  
15 7 difference between the “challenge level” and “skill level” set by occupational therapist and  
16  
17 8 client, which is 1 or less, respectively. For example, regarding activity on bathing, if the  
18  
19 9 occupational therapist evaluates challenge level to 4, skill level to 5 and the client himself  
20  
21 10 evaluates challenge level to 4, skill level to 4, we judge that it is adjusted. If the occupational  
22  
23 11 therapist evaluates challenge level to 4, skill level to 4, and the client himself evaluates  
24  
25 12 challenge level to 4, skill level to 2, it judges that it is not adjusted.  
26  
27  
28

29 13 5. After the client has performed the adjusted activities, the client’s challenge–skill levels will be  
30  
31 14 re-evaluated. When the client’s challenge–skill levels are determined to be balanced,  
32  
33 15 interventions centered on the improvement of performance of the activities will commence. If  
34  
35 16 the client’s challenge–skill levels are not balanced, the activities will then be re-adjusted, and  
36  
37 17 the intervention will start once the levels are balanced. The intervention will aim to improve the  
38  
39 18 client’s skill levels on the activities once their challenge–skill levels have been balanced.  
40  
41  
42

43 19 6. This re-assessment process will occur at least once a week.  
44  
45  
46  
47

## 48 21 **Control group**

49  
50 22 For the control group, the first and second sessions will be conducted similar to that conducted for  
51  
52 23 the experimental group, except that the therapists will not be informed of the client’s subjective  
53  
54 24 perception of the challenge and skill levels for the activities. From the third session onwards, the  
55  
56 25 therapists will simply assess the client’s performance and conduct the therapy in a manner typical of  
57  
58 26 OT, following the general guidelines for OT practice.  
59  
60

## 2 **Outcomes**

3  
4  
5  
6  
7  
8  
9  
10  
11  
12  
13  
14  
15  
16  
17  
18  
19  
20  
21  
22  
23  
24  
25  
26  
27  
28  
29  
30  
31  
32  
33  
34  
35  
36  
37  
38  
39  
40  
41  
42  
43  
44  
45  
46  
47  
48  
49  
50  
51  
52  
53  
54  
55  
56  
57  
58  
59  
60

3 Outcomes will be measured at entry (pre) and discharge from the unit (post) and at 3 months afterwards (follow-up). The primary outcome measure will be subjective QOL. All outcomes to be measured are listed below:

### 6 ***Subjective quality of life (pre, post, and follow-up)***

7 Ikigai-9 is a self-assessed psychological instrument for measuring an individual's mental state (reason for living; ikigai) and QOL [35]. It comprises nine items; a total score (9–45 points) and three subscale scores (of 15 points each) are calculated.

### 10 ***Health-related quality of life (pre, post, and follow-up)***

11 Health-related QOL will be assessed using the EQ-5D. The EQ-5D defines health-related QOL with five dimensions: mobility, self-care, day-to-day activities, pain and discomfort, and anxiety or depression [29]. The EQ-5D also has a visual analog scale (EQ-VAS) that enables self-assessment on a scale from 0 (worst possible health) to 100 (best possible health).

### 15 ***Flow experience (pre and post)***

16 Flow experience will be assessed using the Flow State Scale for Occupational Tasks [36], developed for clinical situations. Since the Flow state scale for occupational task in this study is to be carried out for occupational therapy in the recovery rehabilitation unit, this evaluation is not carried out at follow-up (after discharge). This consists of 14 items and three factors. The items were measured on a seven-point scale ranging from “strong disagreement” (1) to “strong agreement” (7), with possible scores ranging from 7 to 98.

### 22 ***Activities of daily living (pre and post)***

23 ADL will be measured using the Functional Independence Measure (FIM) [37]. FIM is assessed by occupational therapist during admission to the recovery rehabilitation unit, and not implemented at follow-up. FIM is an 18-item, seven-level scale that uniformly assesses the severity of an

1 individual's disability and medical rehabilitation functional outcome. The range of values for FIM  
2 is from 18 (dependent) to 126 (fully independent).

### 3 ***Clinical global impression (post)***

4 The Clinical Global Impression (CGI) rating scales are measures of overall treatment improvement.  
5 CGI is rated on a seven-point scale, with the severity of illness scale using a range of responses from  
6 1 indicating "very much improved" to 7 indicating "very much worse" [38]. CGI is used for  
7 determining the minimally important change (MIC) [39] in the main outcome (QOL).

### 8 ***ACS implementation status for occupational therapy (post)***

9 Evaluation of ACS implementation status will be conducted by the occupational therapists. This  
10 evaluation method was prepared for this research to verify whether the experimental process is  
11 feasible. This evaluation is rated on a seven-point scale from "very poor" (1) to "excellent" (7) and  
12 consists of the following three items: 1) Whether differences in recognition between the client and  
13 the therapist were confirmed, 2) whether differences in recognition between the client and the  
14 therapist were adjusted during OT, and 3) whether OT suitable for the client was provided. The  
15 occupational therapist will fill out this evaluation following each interventional session with a client.

### 17 **Statistical analysis**

18 All statistical analyses will be performed using SPSS Ver. 24.0 for Macintosh (SPSS, Chicago, IL,  
19 USA). Data will be de-identified and entered into Microsoft Excel 2016 and subsequently exported  
20 into SPSS software for analysis. The analysis will be performed by the statistician who will be blinded  
21 to the random group assignments. The chief researcher will have access to the final trial dataset.  
22 Baseline characteristics of the groups will be compared using chi-square and independent samples t-  
23 tests for the categorical variables. The Mann–Whitney U test will be used for assessing baseline  
24 continuous variables. Primary analysis for this study will be performed using intention to treat  
25 principles.

### ***Generalized linear mixed model***

Each continuous outcome variable will be analyzed using a generalized linear mixed model (GLMM) fitted with a maximum likelihood estimation. We will assign the following fixed effects: group (experimental or control group), time (pre, post, or 3-month follow-up), and the interaction of group and time. In addition, we will include the participants as a random effect. All participants who provided baseline data are included in the analysis. LMM is an appropriate statistical method for longitudinal design studies with missing data in clinical trials [40]. All confidence intervals will be provided with 95% margins. For all tests, a two-sided significance level of  $p < 0.05$  will be used. Between-groups effect sizes will be calculated as standardized mean differences.

### ***Minimal importance change***

MIC for each outcome will be calculated using the anchor-based method [41]. The area under the receiver operating characteristic curve will identify the cut-off point on CGI scores that most optimally distinguishes between CGI scores of minimal improvement (1–3) and scores of no difference (4–7). The cut-off will be used to provide an MIC estimate that will maximize the Youden J statistic: sensitivity – (1–specificity) [42]. On the other hand, since there are few possibilities of deteriorating in the recovery rehabilitation unit, there is a possibility of adopting a method that uses MIC as each outcome mean value of the client who evaluated CGI as 3 (slightly improved) [43].

### ***Cost-effectiveness***

A cost-effectiveness analysis will be performed using the total cost and quality-adjusted life years (QALYs) based on the index value of EQ-5D. Incremental cost-effectiveness ratios (ICERs) will be calculated based on comparisons of the experimental and control groups. The total cost will be converted into US dollars using the average currency exchange rate at the time of data analysis. ICER will be estimated using the following equation:

$$\text{ICER} = [\mu_{\text{Ce}} - \mu_{\text{Cc}}] / [\mu_{\text{Ee}} - \mu_{\text{Ec}}]$$

1  
2 1 where  $\mu_C$  and  $\mu_E$  represent the mean cost and mean QALY for the experimental and control groups,  
3  
4 2 respectively. To account for uncertainty of ICER, the bootstrap method (1000 times) will be used for  
5  
6 3 calculating mean values [44].  
7  
8  
9 4

## 11 5 **Ethics and dissemination**

13 6 All recruited clients will need to provide written, informed consent. This protocol has been approved  
14  
15 7 by the ethics review committee of the Tokyo Metropolitan University (No.17020). The study results  
16  
17 8 will be disseminated through peer-reviewed publications.  
18  
19  
20 9

## 23 10 **Discussion**

25 11 This research protocol proposal was prepared to examine the effect of ACS-OT on subjective QOL  
26  
27 12 of clients in a recovery rehabilitation unit as an RCT. The process to be used in this study was devised  
28  
29 13 based on the flow model and shares the perception of activities between the client and occupational  
30  
31 14 therapist. Also, this process highlights the importance of provision of appropriate activities for clients.  
32  
33 15 The client's perception of their challenge–skill balance is highly relevant to the degree of difficulty  
34  
35 16 and occupational performance of activities provided by OT. We believe that understanding the  
36  
37 17 client's subjective assessment of their activities according to their challenge–skill balance supports  
38  
39 18 effective OT.  
40  
41  
42

43 19 A previous RCT that used a similar protocol for older adults in an adult day program observed  
44  
45 20 improvements in health-related QOL [24]. However, only one activity was examined and a follow-  
46  
47 21 up period was not set. The current proposal will cover several activities such as toilet, bathing,  
48  
49 22 cooking, shopping in which clients would require assistance during admission to a recovery  
50  
51 23 rehabilitation unit. Furthermore, by setting a follow-up period, we will verify the continuity of the  
52  
53 24 effect in addition to the direct effect of ACS-OT implementation. We hypothesize that ACS-OT will  
54  
55 25 enhance the effects of positive emotions and self-affirmation by facilitating activities suitable for  
56  
57 26 clients. As such, subjective QOL (according to the Ikigai-9) is the main outcome. Importantly, this  
58  
59  
60



1 suggests that improvements in OT yield new findings on subjective QOL. In addition, using a GLMM,  
2 it will be possible to perform an analysis that considers individual differences as a random effect.  
3  
4  
5  
6  
7

#### 8 **4 Study limitations**

9 Subjective evaluations, such as subjective QOL, health-related QOL, and flow experience, are highly  
10 likely to result in measurement bias. To address this, we will adopt an RCT design and perform self-  
11 assessed outcome measurements. In addition, there is a blinding problem in this RCT as the  
12 investigators in this study are occupational therapists, and thus, it will be difficult to blind  
13 occupational therapists to their assignment and intervention method.

14 We will use a convenience sample from the recovery rehabilitation unit of a single hospital, which  
15 may not be representative of all clients in a recovery rehabilitation unit. This study will not include  
16 patients with acute or subacute diseases, outpatients, and clients who use community rehabilitation  
17 services. Therefore, our results cannot be generalized to these populations.  
18  
19  
20  
21  
22  
23  
24  
25  
26  
27  
28  
29  
30  
31  
32  
33  
34  
35  
36  
37  
38  
39  
40  
41  
42  
43  
44  
45  
46  
47  
48  
49  
50  
51  
52  
53  
54  
55  
56  
57  
58  
59  
60

## Reference

1. Law, M. C. (Ed.). Client centered occupational therapy. Slack Incorporated. 1998.
2. Fearing, V. G., & Clark, J. (Eds.). Individuals in context: A practical guide to client-centered practice. Slack Incorporated. 2000.
3. Townsend, E., & Wilcock, A. Occupational justice and client-centred practice: A dialogue in progress. *Canadian journal of occupational therapy* 2004; **71**:75-87.
4. Sumsion, T., & Law, M. A review of evidence on the conceptual elements informing client-centred practice. *Canadian Journal of Occupational Therapy* 2006; **73**:153-162.
5. Whalley Hammell, K. R. Client-centred occupational therapy: the importance of critical perspectives. *Scandinavian journal of occupational therapy* 2015; **22**:237-243.
6. Atchley, R. C. A continuity theory of normal aging. *The gerontologist* 1989; **29**:183-190.
7. Atchley, R.C. Continuity and adaptation in aging: Creating positive experiences. Johns Hopkins University Press. 2000.
8. Maitra, K.K., Erway, F. Perception of client-centered practice in occupational therapists and their clients. *American Journal of Occupational Therapy* 2006; **60**:298-310.
9. Yoshida, I., Mima, H., Nonaka, T., Kobayashi, R., Hirao, K. Analysis of subjective evaluation in occupations of the elderly: A study based on the flow model (in Japanese). *The Journal of Japanese Occupational Therapy Association*. 2016; **35**:70-79.
10. Vallerand, R. J., & O'connor, B. P. Motivation in the elderly: A theoretical framework and some promising findings. *Canadian Psychology/Psychologie canadienne* 1989; **30**:538.
11. Krause, N. Stressors in salient social roles and well-being in later life. *Journal of Gerontology* 1994; **49**:137-148.
12. Csikszentmihalyi, M. Play and intrinsic rewards. *Journal of humanistic psychology*. 1975.
13. Csikszentmihalyi, M., Csikszentmihalyi, I.S, editors. Optimal experience: Psychological studies of flow in consciousness. Cambridge university press. 1992.

- 1  
2 1 14. Haworth, J., Evans, S. Challenge, skill and positive subjective states in the daily life of a  
3  
4 2 sample of YTS students. *Journal of Occupational and Organizational Psychology* 1995;  
5  
6 3 **68**:109-121.  
7  
8  
9 4 15. Nielsen, K., Cleal, B. Predicting flow at work: Investigating the activities and job  
10  
11 5 characteristics that predict flow states at work. *Journal of Occupational Health Psychology*  
12  
13 6 2010; **15**:180-190.  
14  
15  
16 7 16. Larson, E., von Eye, A. Beyond flow: temporality and participation in everyday activities.  
17  
18 8 *American Journal of Occupational Therapy* 2010; **64**:152-163.  
19  
20 9 17. Rebeiro, K, L., Polgar, J, M. Enabling occupational performance: optimal experiences in  
21  
22 10 therapy. *Canadian Journal of Occupational Therapy* 1999; **66**:14-22.  
23  
24  
25 11 18. Wright, J, J., Sadlo, G., Stew, G. Further explorations into the conundrum of flow process.  
26  
27 12 *Journal of Occupational Science* 2007; **14**:136-144.  
28  
29  
30 13 19. Hirao, K., Kobayashi, R., Okishima, K., Tomokuni, Y. Flow experience and health-related  
31  
32 14 quality of life in community dwelling elderly Japanese. *Nursing & health sciences* 2012; **14**:52-  
33  
34 15 57.  
35  
36  
37 16 20. Yasunaga, M., Kobayashi, N., Yamada, T. The challenge skill ratio of users' experiences at an  
38  
39 17 adult daycare center: Emotional states based on the Flow model (in Japanese). *The Journal of*  
40  
41 18 *Japanese Occupational Therapy Association* 2012; **31**:83-93.  
42  
43  
44 19 21. Massimini, F., Csikszentmihalyi, M., & Carli, M. The Monitoring of Optimal Experience. A  
45  
46 20 Tool for Psychiatric Rehabilitation. *The Journal of Nervous and Mental Disease* 1987;  
47  
48 21 **175**:545-549.  
49  
50  
51 22 22. Moneta, G. B., & Csikszentmihalyi, M. The effect of perceived challenges and skills on the  
52  
53 23 quality of subjective experience. *Journal of personality* 1996; **64**:275-310.  
54  
55 24 23. Novak, T. P., & Hoffman, D. L. Measuring the flow experience among web users. *Interval*  
56  
57 25 *Research Corporation* 1997; **31**:1-36.  
58  
59  
60

- 1  
2 1 24. Yoshida, I., Hirao, K., Nonaka, T. Adjusting Challenge–Skill Balance to Improve Quality of  
3  
4 2 Life in Older Adults: A Randomized Controlled Trial. *American Journal of Occupational*  
5  
6 3 *Therapy* 2018; **72**:1-8.  
7  
8  
9 4 25. Chan, A. W., Tetzlaff, J. M., Altman, D. G., Laupacis, A., Gøtzsche, P. C., Krleža-Jerić, K., &  
10  
11 5 Doré, C. J. SPIRIT 2013 statement: Defining standard protocol items for clinical trials.  
12  
13 6 *Japanese Pharmacology and Therapeutics* 2017; **45**, 1895-1904.  
14  
15  
16 7 26. Schulz, K. F., Altman, D. G., & Moher, D. CONSORT 2010 statement: updated guidelines for  
17  
18 8 reporting parallel group randomized trials. *Annals of internal medicine* 2010; **152**:726-732.  
19  
20  
21 9 27. Schiavi, M., Costi, S., Pellegrini, M., Formisano, D., Borghi, S., & Fugazzaro, S. Occupational  
22  
23 10 therapy for complex inpatients with stroke: identification of occupational needs in post-acute  
24  
25 11 rehabilitation setting. *Disability and rehabilitation* 2018; **40**:1026-1032.  
26  
27  
28 12 28. Erdfelder, E., Faul, F., & Buchner, A. GPOWER: A general power analysis program. *Behavior*  
29  
30 13 *research methods, instruments, & computers* 1996; **28**:1-11.  
31  
32  
33 14 29. EuroQol, G. EuroQol-a new facility for the measurement of health-related quality of life.  
34  
35 15 *Health policy* 1990; **16**:199-208.  
36  
37  
38 16 30. Anthony, J. C., LeResche, L., Niaz, U., Von Korff, M. R., & Folstein, M. F. Limits of the  
39  
40 17 ‘Mini-Mental State’ as a screening test for dementia and delirium among hospital patients.  
41  
42 18 *Psychological medicine* 1982; **12**:397-408.  
43  
44  
45 19 31. American Occupational Therapy Association. Occupational therapy practice framework:  
46  
47 20 Domain and process (3rd ed.). *American Journal of Occupational Therapy* 2014; **68**:S1-S48.  
48  
49  
50 21 32. Law, M., Baptiste, S., McColl, M., Opzoomer, A., Polatajko, H., & Pollock, N. The Canadian  
51  
52 22 occupational performance measure: an outcome measure for occupational therapy. *Canadian*  
53  
54 23 *Journal of Occupational Therapy* 1990; **57**:82-87.  
55  
56  
57 24 33. Csikszentmihalyi, M., Larson, R. Being adolescent: Conflict and growth in the teenage years.  
58  
59 25 Basic Books. 1986.  
60

- 1  
2 1 34. Engeser, S., Rheinberg, F. Flow, moderators of challenge-skill-balance and performance.  
3  
4 2 *Motivation and Emotion* 2008; **32**:158-172.  
5  
6 3 35. Imai, T., Osada, H., Nishimura, Y. The reliability and validity of a new scale for measuring the  
7  
8 4 concept of Ikigai (Ikigai-9) (in Japanese). *Japanese Journal of Public Health* 2012; **59**:433-  
9  
10 439.  
11  
12 36. Yoshida, K., Asakawa, K., Yamauchi, T., Sakuraba, S., Sawamura, D., Murakami, Y., et al.  
13  
14 7 The flow state scale for occupational tasks: development, reliability, and validity. *Hong Kong*  
15  
16 8 *Journal of Occupational Therapy* 2013; **23**:54-61.  
17  
18 9 37. Granger, C. V., Hamilton, B. B., Keith, R. A., Zielezny, M., Sherwin, F. S. Advances in  
19  
20 10 functional assessment for medical rehabilitation. *Topics in geriatric rehabilitation* 1986; **1**:59-  
21  
22 11 74.  
23  
24 38. Guy, W. Clinical global impression scale. The ECDEU Assessment Manual for  
25  
26 12 Psychopharmacology-Revised Volume DHEW Publ No ADM 1976; **76**:218-222.  
27  
28 13 39. Crosby, R. D., Kolotkin, R. L., & Williams, G. R. Defining clinically meaningful change in  
29  
30 14 health-related quality of life. *Journal of clinical epidemiology* 2003; **56**:395-40.  
31  
32 15 40. Shek, D. T., Ma, C. M. Longitudinal data analyses using linear mixed models in SPSS:  
33  
34 16 concepts, procedures and illustrations. *Scientific World Journal* 2011; **5**:42-76.  
35  
36 17 41. de Vet, H. C., Ostelo, R. W., Terwee, C. B., van der Roer, N., Knol, D. L., Beckerman, H., &  
37  
38 18 Bouter, L. M. Minimally important change determined by a visual method integrating an  
39  
40 19 anchor-based and a distribution-based approach. *Quality of life research* 2007; **16**:131.  
41  
42 20 42. Youden, W. J. Index for rating diagnostic tests. *Cancer* 1950; **3**:32-35.  
43  
44 21 43. van Kampen, D. A., Willems, W. J., van Beers, L. W., Castelein, R. M., Scholtes, V. A., &  
45  
46 22 Terwee, C. B. Determination and comparison of the smallest detectable change (SDC) and the  
47  
48 23 minimal important change (MIC) of four-shoulder patient-reported outcome measures  
49  
50 24 (PROMs). *Journal of orthopaedic surgery and research* 2013; **8**, 40.  
51  
52  
53  
54  
55  
56  
57  
58  
59  
60

1  
2  
3  
4  
5  
6  
7  
8  
9  
10  
11  
12  
13  
14  
15  
16  
17  
18  
19  
20  
21  
22  
23  
24  
25  
26  
27  
28  
29  
30  
31  
32  
33  
34  
35  
36  
37  
38  
39  
40  
41  
42  
43  
44  
45  
46  
47  
48  
49  
50  
51  
52  
53  
54  
55  
56  
57  
58  
59  
60

1 44. Briggs, A. H., Wonderling, D. E., & Mooney, C. Z. Pulling cost-effectiveness analysis up by its  
2  
3  
4 2 bootstraps: A non-parametric approach to confidence interval estimation. *Health economics*  
5  
6  
7 3 1997; **6**:327-340.

For peer review only

1  
2 **1 Footnotes**  
3

4  
5  
6  
7 **3 Authors' contributions:** IY conceived and designed the experiments. IY performed the experiments.  
8  
9 **4** IY and KH analyzed data. IY drafted the paper. KH and RK made further reviews as well as  
10  
11 **5** modifications. RK is also responsible for managing voluntarily reported adverse events from clients  
12  
13 **6** and other unintended effects of the intervention. All authors have read and approved the final  
14  
15 **7** manuscript.  
16  
17

18  
19  
20 **9 Acknowledgements:** We appreciate the clients who participated in our research. In addition, we  
21  
22 **10** appreciate the clients and public consultants who advised on research subjects, research designs, and  
23  
24 **11** outcome measures.  
25  
26

27  
28  
29 **13 Funding statement:** This work was supported by Japanese Association of Occupational Therapists  
30  
31 **14** Grant, number 2017-04.  
32  
33

34 **15**  
35  
36 **16 Competing interests statement:** None declared.  
37  
38  
39 **17**  
40  
41  
42  
43  
44  
45  
46  
47  
48  
49  
50  
51  
52  
53  
54  
55  
56  
57  
58  
59  
60

1  
2  
3  
4  
5  
6  
7  
8  
9  
10  
11  
12  
13  
14  
15  
16  
17  
18  
19  
20  
21  
22  
23  
24  
25  
26  
27  
28  
29  
30  
31  
32  
33  
34  
35  
36  
37  
38  
39  
40  
41  
42  
43  
44  
45  
46  
47  
48  
49  
50  
51  
52  
53  
54  
55  
56  
57  
58  
59  
60

1 Figure 1. SPIRIT diagram describing schedule of enrolment, interventions and assessments

For peer review only



Figure 1. SPIRIT diagram describing schedule of enrolment, interventions and assessments.

| TIMEPOINT                              | Study Period |          |            |                 |           |           |
|----------------------------------------|--------------|----------|------------|-----------------|-----------|-----------|
|                                        | Enrolment    | Baseline | Allocation | Post-allocation |           | Close-out |
|                                        | 0            | 0        | 0          | Intervention    | Discharge | 3months   |
| <b>ENROLMENT:</b>                      |              |          |            |                 |           |           |
| Eligibility screen                     | X            |          |            |                 |           |           |
| Informed consent                       | X            |          |            |                 |           |           |
| Allocation                             |              |          | X          |                 |           |           |
| <b>INTERVENTIONS:</b>                  |              |          |            |                 |           |           |
| Experimental Group                     |              |          |            | ←→              |           |           |
| Control Group                          |              |          |            | ←→              |           |           |
| <b>ASSESSMENTS:</b>                    |              |          |            |                 |           |           |
| Baseline variables                     | X            |          |            |                 |           |           |
| Ikigai-9                               |              | X        |            |                 | X         | X         |
| EQ-5D                                  |              | X        |            |                 | X         | X         |
| Flow state scale for occupational task |              | X        |            |                 | X         |           |
| FIM                                    |              | X        |            |                 | X         |           |
| CGI                                    |              |          |            |                 | X         |           |
| ACS implementation status              |              |          |            |                 | X*        |           |

\* ACS implementation status covered the experimental group

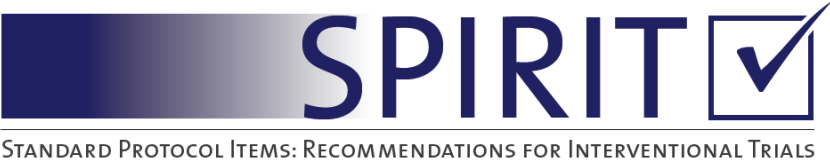

SPIRIT 2013 Checklist: Recommended items to address in a clinical trial protocol and related documents\*

| Section/item                      | Item No | Description                                                                                                                                                                                                                                                                              | Addressed on page number                         |
|-----------------------------------|---------|------------------------------------------------------------------------------------------------------------------------------------------------------------------------------------------------------------------------------------------------------------------------------------------|--------------------------------------------------|
| <b>Administrative information</b> |         |                                                                                                                                                                                                                                                                                          |                                                  |
| Title                             | 1       | Descriptive title identifying the study design, population, interventions, and, if applicable, trial acronym                                                                                                                                                                             | p1 l-2                                           |
| Trial registration                | 2a      | Trial identifier and registry name. If not yet registered, name of intended registry                                                                                                                                                                                                     | p2 l11-12                                        |
|                                   | 2b      | All items from the World Health Organization Trial Registration Data Set                                                                                                                                                                                                                 | Contained in various parts throughout manuscript |
| Protocol version                  | 3       | Date and version identifier                                                                                                                                                                                                                                                              | p2 l11-12                                        |
| Funding                           | 4       | Sources and types of financial, material, and other support                                                                                                                                                                                                                              | p19 l13-14                                       |
| Roles and responsibilities        | 5a      | Names, affiliations, and roles of protocol contributors                                                                                                                                                                                                                                  | p1 l4-12, p19 l3-7                               |
|                                   | 5b      | Name and contact information for the trial sponsor                                                                                                                                                                                                                                       | p1 l4-12                                         |
|                                   | 5c      | Role of study sponsor and funders, if any, in study design; collection, management, analysis, and interpretation of data; writing of the report; and the decision to submit the report for publication, including whether they will have ultimate authority over any of these activities | p19 l13-14                                       |

1 5d Composition, roles, and responsibilities of the coordinating centre, steering committee, endpoint  
 2 adjudication committee, data management team, and other individuals or groups overseeing the trial, if  
 3 applicable (see Item 21a for data monitoring committee)  
 4  
 5  
 6  
 7  
 8  
 9

n/a

## 10 Introduction

11 Background and 6a Description of research question and justification for undertaking the trial, including summary of relevant  
 12 rationale studies (published and unpublished) examining benefits and harms for each intervention p4 l1-p5 l17  
 13  
 14 6b Explanation for choice of comparators p5 l20  
 15  
 16 Objectives 7 Specific objectives or hypotheses p5 l13-17  
 17  
 18 Trial design 8 Description of trial design including type of trial (eg, parallel group, crossover, factorial, single group),  
 19 allocation ratio, and framework (eg, superiority, equivalence, noninferiority, exploratory) p6 l18-19  
 20  
 21  
 22

## 23 Methods: Participants, interventions, and outcomes

24 Study setting 9 Description of study settings (eg, community clinic, academic hospital) and list of countries where data will  
 25 be collected. Reference to where list of study sites can be obtained p7 l11-12  
 26  
 27 Eligibility criteria 10 Inclusion and exclusion criteria for participants. If applicable, eligibility criteria for study centres and  
 28 individuals who will perform the interventions (eg, surgeons, psychotherapists) p7 l10-16  
 29  
 30 Interventions 11a Interventions for each group with sufficient detail to allow replication, including how and when they will be  
 31 administered p7 l25-p9 l26  
 32  
 33 11b Criteria for discontinuing or modifying allocated interventions for a given trial participant (eg, drug dose  
 34 change in response to harms, participant request, or improving/worsening disease) p7 l15-16  
 35  
 36 11c Strategies to improve adherence to intervention protocols, and any procedures for monitoring adherence  
 37 (eg, drug tablet return, laboratory tests) p8 l10-11  
 38  
 39 11d Relevant concomitant care and interventions that are permitted or prohibited during the trial p9 l1-3  
 40  
 41  
 42

|    |                      |    |                                                                                                                                                                                                                                                                                                                                                                                |                |
|----|----------------------|----|--------------------------------------------------------------------------------------------------------------------------------------------------------------------------------------------------------------------------------------------------------------------------------------------------------------------------------------------------------------------------------|----------------|
| 1  | Outcomes             | 12 | Primary, secondary, and other outcomes, including the specific measurement variable (eg, systolic blood pressure), analysis metric (eg, change from baseline, final value, time to event), method of aggregation (eg, median, proportion), and time point for each outcome. Explanation of the clinical relevance of chosen efficacy and harm outcomes is strongly recommended | p10 l2-p11 l16 |
| 6  | Participant timeline | 13 | Time schedule of enrolment, interventions (including any run-ins and washouts), assessments, and visits for participants. A schematic diagram is highly recommended (see Figure)                                                                                                                                                                                               | Figure 1       |
| 10 | Sample size          | 14 | Estimated number of participants needed to achieve study objectives and how it was determined, including clinical and statistical assumptions supporting any sample size calculations                                                                                                                                                                                          | p6 l9-15       |
| 13 | Recruitment          | 15 | Strategies for achieving adequate participant enrolment to reach target sample size                                                                                                                                                                                                                                                                                            | p6 l14-15      |

**Methods: Assignment of interventions (for controlled trials)**

Allocation:

|    |                                  |     |                                                                                                                                                                                                                                                                                                                                                          |              |
|----|----------------------------------|-----|----------------------------------------------------------------------------------------------------------------------------------------------------------------------------------------------------------------------------------------------------------------------------------------------------------------------------------------------------------|--------------|
| 19 | Sequence generation              | 16a | Method of generating the allocation sequence (eg, computer-generated random numbers), and list of any factors for stratification. To reduce predictability of a random sequence, details of any planned restriction (eg, blocking) should be provided in a separate document that is unavailable to those who enrol participants or assign interventions | p6 l19-p7 l6 |
| 25 | Allocation concealment mechanism | 16b | Mechanism of implementing the allocation sequence (eg, central telephone; sequentially numbered, opaque, sealed envelopes), describing any steps to conceal the sequence until interventions are assigned                                                                                                                                                | p7 l2-5      |
| 30 | Implementation                   | 16c | Who will generate the allocation sequence, who will enrol participants, and who will assign participants to interventions                                                                                                                                                                                                                                | p7 l2-6      |
| 33 | Blinding (masking)               | 17a | Who will be blinded after assignment to interventions (eg, trial participants, care providers, outcome assessors, data analysts), and how                                                                                                                                                                                                                | p7 l6-8      |
| 36 |                                  | 17b | If blinded, circumstances under which unblinding is permissible, and procedure for revealing a participant's allocated intervention during the trial                                                                                                                                                                                                     | p7 l6-8      |

## Methods: Data collection, management, and analysis

|    |                            |     |                                                                                                               |                     |
|----|----------------------------|-----|---------------------------------------------------------------------------------------------------------------|---------------------|
| 1  |                            |     |                                                                                                               |                     |
| 2  |                            |     |                                                                                                               |                     |
| 3  |                            |     |                                                                                                               |                     |
| 4  | Data collection            | 18a | Plans for assessment and collection of outcome, baseline, and other trial data, including any related         | p10 I3-4            |
| 5  | methods                    |     | processes to promote data quality (eg, duplicate measurements, training of assessors) and a description of    |                     |
| 6  |                            |     | study instruments (eg, questionnaires, laboratory tests) along with their reliability and validity, if known. |                     |
| 7  |                            |     | Reference to where data collection forms can be found, if not in the protocol                                 |                     |
| 8  |                            |     |                                                                                                               |                     |
| 9  |                            | 18b | Plans to promote participant retention and complete follow-up, including list of any outcome data to be       | p7 I20-21, p12 I6-8 |
| 10 |                            |     | collected for participants who discontinue or deviate from intervention protocols                             |                     |
| 11 |                            |     |                                                                                                               |                     |
| 12 | Data management            | 19  | Plans for data entry, coding, security, and storage, including any related processes to promote data quality  | p11 I20-21          |
| 13 |                            |     | (eg, double data entry; range checks for data values). Reference to where details of data management          |                     |
| 14 |                            |     | procedures can be found, if not in the protocol                                                               |                     |
| 15 |                            |     |                                                                                                               |                     |
| 16 |                            |     |                                                                                                               |                     |
| 17 | Statistical methods        | 20a | Statistical methods for analysing primary and secondary outcomes. Reference to where other details of the     | p12 I2-10           |
| 18 |                            |     | statistical analysis plan can be found, if not in the protocol                                                |                     |
| 19 |                            |     |                                                                                                               |                     |
| 20 |                            | 20b | Methods for any additional analyses (eg, subgroup and adjusted analyses)                                      | p12 I11-p13 I4      |
| 21 |                            |     |                                                                                                               |                     |
| 22 |                            | 20c | Definition of analysis population relating to protocol non-adherence (eg, as randomised analysis), and any    |                     |
| 23 |                            |     | statistical methods to handle missing data (eg, multiple imputation)                                          | p12 I6-8            |
| 24 |                            |     |                                                                                                               |                     |
| 25 |                            |     |                                                                                                               |                     |
| 26 | <b>Methods: Monitoring</b> |     |                                                                                                               |                     |
| 27 |                            |     |                                                                                                               |                     |
| 28 | Data monitoring            | 21a | Composition of data monitoring committee (DMC); summary of its role and reporting structure; statement of     | n/a                 |
| 29 |                            |     | whether it is independent from the sponsor and competing interests; and reference to where further details    | Low risk            |
| 30 |                            |     | about its charter can be found, if not in the protocol. Alternatively, an explanation of why a DMC is not     | intervention        |
| 31 |                            |     | needed                                                                                                        |                     |
| 32 |                            |     |                                                                                                               |                     |
| 33 |                            |     |                                                                                                               |                     |
| 34 |                            | 21b | Description of any interim analyses and stopping guidelines, including who will have access to these interim  | n/a                 |
| 35 |                            |     | results and make the final decision to terminate the trial                                                    | Low risk            |
| 36 |                            |     |                                                                                                               | intervention        |
| 37 |                            |     |                                                                                                               |                     |
| 38 | Harms                      | 22  | Plans for collecting, assessing, reporting, and managing solicited and spontaneously reported adverse         | p19 I5-6            |
| 39 |                            |     | events and other unintended effects of trial interventions or trial conduct                                   |                     |
| 40 |                            |     |                                                                                                               |                     |
| 41 |                            |     |                                                                                                               |                     |
| 42 |                            |     |                                                                                                               |                     |
| 43 |                            |     |                                                                                                               |                     |
| 44 |                            |     |                                                                                                               |                     |
| 45 |                            |     |                                                                                                               |                     |
| 46 |                            |     |                                                                                                               |                     |

|    |                                 |     |                                                                                                                                                                                                                                                                                     |                                 |
|----|---------------------------------|-----|-------------------------------------------------------------------------------------------------------------------------------------------------------------------------------------------------------------------------------------------------------------------------------------|---------------------------------|
| 1  | Auditing                        | 23  | Frequency and procedures for auditing trial conduct, if any, and whether the process will be independent from investigators and the sponsor                                                                                                                                         | n/a<br>Low risk<br>intervention |
| 2  |                                 |     |                                                                                                                                                                                                                                                                                     |                                 |
| 3  |                                 |     |                                                                                                                                                                                                                                                                                     |                                 |
| 4  |                                 |     |                                                                                                                                                                                                                                                                                     |                                 |
| 5  |                                 |     |                                                                                                                                                                                                                                                                                     |                                 |
| 6  | <b>Ethics and dissemination</b> |     |                                                                                                                                                                                                                                                                                     |                                 |
| 7  |                                 |     |                                                                                                                                                                                                                                                                                     |                                 |
| 8  | Research ethics approval        | 24  | Plans for seeking research ethics committee/institutional review board (REC/IRB) approval                                                                                                                                                                                           | p13 l6-8                        |
| 9  |                                 |     |                                                                                                                                                                                                                                                                                     |                                 |
| 10 |                                 |     |                                                                                                                                                                                                                                                                                     |                                 |
| 11 | Protocol amendments             | 25  | Plans for communicating important protocol modifications (eg, changes to eligibility criteria, outcomes, analyses) to relevant parties (eg, investigators, REC/IRBs, trial participants, trial registries, journals, regulators)                                                    | No changes anticipated          |
| 12 |                                 |     |                                                                                                                                                                                                                                                                                     |                                 |
| 13 |                                 |     |                                                                                                                                                                                                                                                                                     |                                 |
| 14 |                                 |     |                                                                                                                                                                                                                                                                                     |                                 |
| 15 | Consent or assent               | 26a | Who will obtain informed consent or assent from potential trial participants or authorised surrogates, and how (see Item 32)                                                                                                                                                        | p7 l19-23                       |
| 16 |                                 |     |                                                                                                                                                                                                                                                                                     |                                 |
| 17 |                                 |     |                                                                                                                                                                                                                                                                                     |                                 |
| 18 |                                 | 26b | Additional consent provisions for collection and use of participant data and biological specimens in ancillary studies, if applicable                                                                                                                                               | n/a                             |
| 19 |                                 |     |                                                                                                                                                                                                                                                                                     |                                 |
| 20 |                                 |     |                                                                                                                                                                                                                                                                                     |                                 |
| 21 |                                 |     |                                                                                                                                                                                                                                                                                     |                                 |
| 22 | Confidentiality                 | 27  | How personal information about potential and enrolled participants will be collected, shared, and maintained in order to protect confidentiality before, during, and after the trial                                                                                                | p11 l19-23                      |
| 23 |                                 |     |                                                                                                                                                                                                                                                                                     |                                 |
| 24 |                                 |     |                                                                                                                                                                                                                                                                                     |                                 |
| 25 | Declaration of interests        | 28  | Financial and other competing interests for principal investigators for the overall trial and each study site                                                                                                                                                                       | p19 l16                         |
| 26 |                                 |     |                                                                                                                                                                                                                                                                                     |                                 |
| 27 |                                 |     |                                                                                                                                                                                                                                                                                     |                                 |
| 28 | Access to data                  | 29  | Statement of who will have access to the final trial dataset, and disclosure of contractual agreements that limit such access for investigators                                                                                                                                     | p11 l22-23                      |
| 29 |                                 |     |                                                                                                                                                                                                                                                                                     |                                 |
| 30 |                                 |     |                                                                                                                                                                                                                                                                                     |                                 |
| 31 | Ancillary and post-trial care   | 30  | Provisions, if any, for ancillary and post-trial care, and for compensation to those who suffer harm from trial participation                                                                                                                                                       | n/a                             |
| 32 |                                 |     |                                                                                                                                                                                                                                                                                     |                                 |
| 33 |                                 |     |                                                                                                                                                                                                                                                                                     |                                 |
| 34 | Dissemination policy            | 31a | Plans for investigators and sponsor to communicate trial results to participants, healthcare professionals, the public, and other relevant groups (eg, via publication, reporting in results databases, or other data sharing arrangements), including any publication restrictions | p7 l22-23                       |
| 35 |                                 |     |                                                                                                                                                                                                                                                                                     |                                 |
| 36 |                                 |     |                                                                                                                                                                                                                                                                                     |                                 |
| 37 |                                 |     |                                                                                                                                                                                                                                                                                     |                                 |
| 38 |                                 |     |                                                                                                                                                                                                                                                                                     |                                 |
| 39 |                                 | 31b | Authorship eligibility guidelines and any intended use of professional writers                                                                                                                                                                                                      | n/a                             |
| 40 |                                 |     |                                                                                                                                                                                                                                                                                     |                                 |
| 41 |                                 | 31c | Plans, if any, for granting public access to the full protocol, participant-level dataset, and statistical code                                                                                                                                                                     | n/a                             |
| 42 |                                 |     |                                                                                                                                                                                                                                                                                     |                                 |

1 **Appendices**

2

3 Informed consent 32 Model consent form and other related documentation given to participants and authorised surrogates Will be available in

4 materials Japanese if

5 wanted

6

7 Biological 33 Plans for collection, laboratory evaluation, and storage of biological specimens for genetic or molecular n/a

8 specimens analysis in the current trial and for future use in ancillary studies, if applicable

9

---

10

11 \*It is strongly recommended that this checklist be read in conjunction with the SPIRIT 2013 Explanation & Elaboration for important clarification on the items.

12 Amendments to the protocol should be tracked and dated. The SPIRIT checklist is copyrighted by the SPIRIT Group under the Creative Commons

13 [“Attribution-NonCommercial-NoDerivs 3.0 Unported”](#) license.

14

15

16

17

18

19

20

21

22

23

24

25

26

27

28

29

30

31

32

33

34

35

36

37

38

39

40

41

42

43

44

45

46
